# Supplementary material for: Detection of Potentially Compromised Computer Nodes and Clusters Connected on a Smart Grid, Using Power Consumption Data
Source: Sensors (Basel). 2020 Sep 7;20(18):5075. doi: 10.3390/s20185075 (PMC7570659; doi:10.3390/s20185075)
Supplement: Supplementary file 1 [file sensors-20-05075-s001.xlsx]

## Sheet: Merged Dataset from 3 sensors v
Date and Time	Desktop 1 - Sensor 1 - Application ID	Desktop 1 - Sensor 1 - Current (A)	Desktop 1 - Sensor 1 Power (watt)	Desktop 2 - Sensor 2 - Application ID	Desktop 2 Virus	Desktop 2 - Sensor 2 - Current (A)	Desktop 2 - Sensor 2 Power (watt)	Sensor 3 - Current (A)	Sensor 3 Power (watt)	Group ID
2020-06-28 06:35:00	0	0.207	35	0	0	0.32	44	0.544	88	0
2020-06-28 06:35:00	0	0.206	36	0	0	0.32	40	0.544	84	0
2020-06-28 06:35:00	0	0.206	35	0	0	0.263	38	0.544	84	0
2020-06-28 06:35:00	0	0.206	35	0	0	0.263	39	0.48	74	0
2020-06-28 06:35:00	0	0.206	36	0	0	0.263	41	0.48	77	0
2020-06-28 06:35:00	0	0.21	36	0	0	0.273	43	0.485	77	0
2020-06-28 06:35:00	0	0.21	36	0	0	0.273	43	0.485	80	0
2020-06-28 06:35:00	0	0.205	35	0	0	0.273	41	0.496	80	0
2020-06-28 06:35:00	0	0.205	35	0	0	0.267	39	0.496	77	0
2020-06-28 06:35:00	0	0.207	35	0	0	0.267	39	0.482	75	0
2020-06-28 06:35:00	0	0.207	36	0	0	0.267	38	0.482	75	0
2020-06-28 06:35:00	0	0.206	35	0	0	0.259	36	0.482	74	0
2020-06-28 06:35:00	0	0.206	35	0	0	0.259	41	0.468	72	0
2020-06-28 06:35:00	0	0.205	35	0	0	0.261	39	0.468	74	0
2020-06-28 06:35:00	0	0.205	35	0	0	0.261	39	0.468	74	0
2020-06-28 06:35:00	0	0.205	35	0	0	0.261	39	0.468	74	0
2020-06-28 06:35:00	0	0.205	35	0	0	0.271	42	0.471	75	0
2020-06-28 06:35:00	0	0.204	35	0	0	0.271	41	0.471	77	0
2020-06-28 06:35:00	0	0.204	35	0	0	0.271	44	0.471	76	0
2020-06-28 06:35:00	0	0.205	35	0	0	0.275	38	0.472	85	0
2020-06-28 06:35:00	0	0.205	36	0	0	0.275	37	0.472	74	0
2020-06-28 06:35:00	0	0.204	35	0	0	0.255	37	0.468	72	0
2020-06-28 06:35:00	0	0.204	62	0	0	0.255	36	0.468	72	0
2020-06-28 06:35:00	0	0.204	49	0	0	0.255	36	0.464	72	0
2020-06-28 06:35:00	0	0.211	34	0	0	0.257	37	0.464	81	0
2020-06-28 06:35:00	0	0.211	34	0	0	0.257	37	0.464	72	0
2020-06-28 06:35:00	0	0.204	35	0	0	0.257	37	0.464	72	0
2020-06-28 06:35:00	0	0.204	34	0	0	0.259	38	0.464	72	0
2020-06-28 06:35:00	0	0.205	35	0	0	0.259	38	0.461	74	0
2020-06-28 06:35:00	0	0.205	35	0	0	0.259	37	0.461	73	0
2020-06-28 06:35:00	0	0.207	35	0	0	0.256	39	0.463	72	0
2020-06-28 06:35:00	0	0.207	35	0	0	0.256	53	0.463	72	0
2020-06-28 06:35:00	0	0.205	35	0	0	0.256	53	0.529	73	0
2020-06-28 06:35:00	0	0.205	35	0	0	0.315	53	0.529	89	0
2020-06-28 06:35:00	0	0.202	34	0	0	0.315	53	0.529	88	0
2020-06-28 06:35:00	0	0.202	34	0	0	0.316	53	0.524	88	0
2020-06-28 06:35:00	0	0.202	35	0	0	0.316	54	0.524	88	0
2020-06-28 06:35:00	0	0.202	34	0	0	0.316	54	0.523	88	0
2020-06-28 06:35:00	0	0.202	34	0	0	0.316	53	0.523	89	0
2020-06-28 06:35:00	0	0.202	34	0	0	0.316	53	0.523	89	0
2020-06-28 06:35:00	0	0.202	34	0	0	0.315	53	0.523	88	0
2020-06-28 06:35:00	0	0.202	34	0	0	0.315	53	0.523	88	0
2020-06-28 06:35:00	0	0.204	34	0	0	0.315	54	0.521	88	0
2020-06-28 06:35:00	0	0.204	34	0	0	0.317	54	0.521	88	0
2020-06-28 06:35:00	0	0.203	34	0	0	0.317	55	0.524	88	0
2020-06-28 06:35:00	0	0.203	34	0	0	0.317	53	0.524	89	0
2020-06-28 06:35:00	0	0.2	34	0	0	0.319	54	0.521	88	0
2020-06-28 06:35:00	0	0.2	34	0	0	0.319	38	0.521	88	0
2020-06-28 06:35:00	0	0.202	34	0	0	0.319	37	0.471	89	0
2020-06-28 06:35:00	0	0.202	34	0	0	0.257	37	0.471	72	0
2020-06-28 06:35:00	0	0.202	34	0	0	0.257	37	0.471	72	0
2020-06-28 06:35:00	0	0.202	34	0	0	0.257	37	0.461	72	0
2020-06-28 06:35:00	0	0.204	34	0	0	0.257	37	0.461	72	0
2020-06-28 06:35:00	0	0.204	34	0	0	0.257	37	0.463	72	0
2020-06-28 06:35:00	0	0.2	34	0	0	0.255	37	0.463	72	0
2020-06-28 06:35:00	0	0.2	34	0	0	0.255	37	0.46	71	0
2020-06-28 06:35:00	0	0.202	34	0	0	0.255	37	0.46	71	0
2020-06-28 06:35:00	0	0.202	34	0	0	0.255	37	0.46	71	0
2020-06-28 06:35:00	0	0.206	34	0	0	0.255	37	0.459	71	0
2020-06-28 06:35:00	0	0.206	35	0	0	0.255	37	0.459	72	0
2020-06-28 06:36:00	0	0.202	34	0	0	0.256	37	0.462	73	0
2020-06-28 06:36:00	0	0.202	34	0	0	0.256	37	0.462	72	0
2020-06-28 06:36:00	0	0.201	34	0	0	0.256	37	0.461	71	0
2020-06-28 06:36:00	0	0.201	34	0	0	0.257	37	0.461	71	0
2020-06-28 06:36:00	0	0.201	34	0	0	0.257	37	0.461	71	0
2020-06-28 06:36:00	0	0.201	34	0	0	0.257	37	0.46	72	0
2020-06-28 06:36:00	0	0.2	34	0	0	0.256	37	0.46	72	0
2020-06-28 06:36:00	0	0.2	34	0	0	0.256	37	0.461	71	0
2020-06-28 06:36:00	0	0.2	34	0	0	0.256	37	0.461	72	0
2020-06-28 06:36:00	0	0.2	34	0	0	0.255	36	0.46	72	0
2020-06-28 06:36:00	0	0.2	34	0	0	0.255	36	0.46	71	0
2020-06-28 06:36:00	0	0.2	34	0	0	0.255	36	0.46	71	0
2020-06-28 06:36:00	0	0.2	34	0	0	0.255	36	0.459	71	0
2020-06-28 06:36:00	0	0.201	34	0	0	0.255	37	0.459	71	0
2020-06-28 06:36:00	0	0.201	34	0	0	0.255	37	0.459	72	0
2020-06-28 06:36:00	0	0.201	34	0	0	0.256	40	0.459	72	0
2020-06-28 06:36:00	0	0.201	34	0	0	0.256	38	0.46	71	0
2020-06-28 06:36:00	0	0.201	34	0	0	0.256	37	0.46	72	0
2020-06-28 06:36:00	0	0.201	34	0	0	0.256	37	0.46	72	0
2020-06-28 06:36:00	0	0.201	34	0	0	0.256	37	0.461	71	0
2020-06-28 06:36:00	0	0.201	34	0	0	0.256	37	0.461	72	0
2020-06-28 06:36:00	0	0.2	40	0	0	0.256	37	0.46	71	0
2020-06-28 06:36:00	0	0.2	34	0	0	0.256	37	0.46	72	0
2020-06-28 06:36:00	0	0.207	35	0	0	0.256	37	0.479	82	0
2020-06-28 06:36:00	0	0.207	34	0	0	0.256	36	0.479	72	0
2020-06-28 06:36:00	0	0.202	34	0	0	0.256	37	0.479	72	0
2020-06-28 06:36:00	0	0.202	34	0	0	0.255	36	0.459	71	0
2020-06-28 06:36:00	0	0.2	34	0	0	0.255	37	0.459	71	0
2020-06-28 06:36:00	0	0.2	34	0	0	0.255	37	0.459	71	0
2020-06-28 06:36:00	0	0.202	34	0	0	0.256	37	0.459	71	0
2020-06-28 06:36:00	0	0.202	34	0	0	0.256	43	0.46	71	0
2020-06-28 06:36:00	0	0.203	34	0	0	0.256	55	0.46	73	0
2020-06-28 06:36:00	0	0.203	34	0	0	0.316	53	0.524	73	0
2020-06-28 06:36:00	0	0.201	34	0	0	0.316	53	0.524	88	0
2020-06-28 06:36:00	0	0.201	34	0	0	0.315	53	0.524	88	0
2020-06-28 06:36:00	0	0.2	34	0	0	0.315	53	0.522	88	0
2020-06-28 06:36:00	0	0.2	34	0	0	0.315	53	0.522	87	0
2020-06-28 06:36:00	0	0.202	34	0	0	0.316	53	0.519	87	0
2020-06-28 06:36:00	0	0.202	34	0	0	0.316	53	0.519	87	0
2020-06-28 06:36:00	0	0.2	34	0	0	0.315	53	0.521	88	0
2020-06-28 06:36:00	0	0.2	34	0	0	0.315	55	0.521	88	0
2020-06-28 06:36:00	0	0.199	34	0	0	0.315	53	0.521	88	0
2020-06-28 06:36:00	0	0.199	34	0	0	0.316	53	0.52	88	0
2020-06-28 06:36:00	0	0.2	34	0	0	0.316	54	0.52	88	0
2020-06-28 06:36:00	0	0.2	34	0	0	0.316	54	0.521	88	0
2020-06-28 06:36:00	0	0.2	34	0	0	0.319	54	0.521	88	0
2020-06-28 06:36:00	0	0.2	34	0	0	0.319	38	0.524	88	0
2020-06-28 06:36:00	0	0.2	34	0	0	0.256	37	0.524	88	0
2020-06-28 06:36:00	0	0.2	34	0	0	0.256	36	0.464	75	0
2020-06-28 06:36:00	0	0.2	34	0	0	0.256	36	0.464	71	0
2020-06-28 06:36:00	0	0.2	34	0	0	0.254	36	0.464	71	0
2020-06-28 06:36:00	0	0.203	34	0	0	0.254	37	0.457	71	0
2020-06-28 06:36:00	0	0.203	34	0	0	0.254	36	0.457	70	0
2020-06-28 06:36:00	0	0.199	34	0	0	0.255	37	0.46	72	0
2020-06-28 06:36:00	0	0.199	34	0	0	0.255	37	0.46	71	0
2020-06-28 06:36:00	0	0.2	34	0	0	0.255	37	0.459	71	0
2020-06-28 06:36:00	0	0.2	34	0	0	0.256	37	0.459	72	0
2020-06-28 06:36:00	0	0.201	34	0	0	0.256	37	0.459	72	0
2020-06-28 06:36:00	0	0.201	34	0	0	0.256	37	0.461	72	0
2020-06-28 06:37:00	0	0.203	34	0	0	0.257	37	0.461	71	0
2020-06-28 06:37:00	0	0.203	34	0	0	0.257	37	0.461	72	0
2020-06-28 06:37:00	0	0.201	34	0	0	0.257	37	0.461	72	0
2020-06-28 06:37:00	0	0.201	34	0	0	0.257	37	0.46	72	0
2020-06-28 06:37:00	0	0.201	34	0	0	0.257	37	0.46	71	0
2020-06-28 06:37:00	0	0.201	34	0	0	0.257	37	0.46	72	0
2020-06-28 06:37:00	0	0.201	34	0	0	0.256	37	0.46	72	0
2020-06-28 06:37:00	0	0.201	34	0	0	0.256	37	0.46	71	0
2020-06-28 06:37:00	0	0.2	34	0	0	0.256	37	0.46	72	0
2020-06-28 06:37:00	0	0.2	34	0	0	0.256	37	0.46	72	0
2020-06-28 06:37:00	0	0.2	34	0	0	0.256	36	0.46	72	0
2020-06-28 06:37:00	0	0.201	34	0	0	0.256	36	0.46	72	0
2020-06-28 06:37:00	0	0.201	34	0	0	0.255	37	0.46	71	0
2020-06-28 06:37:00	0	0.199	34	0	0	0.255	37	0.458	71	0
2020-06-28 06:37:00	0	0.199	34	0	0	0.256	37	0.458	71	0
2020-06-28 06:37:00	0	0.2	34	0	0	0.256	37	0.458	71	0
2020-06-28 06:37:00	0	0.199	34	0	0	0.256	37	0.458	72	0
2020-06-28 06:37:00	0	0.199	34	0	0	0.259	37	0.459	71	0
2020-06-28 06:37:00	0	0.202	34	0	0	0.259	37	0.459	72	0
2020-06-28 06:37:00	0	0.202	34	0	0	0.259	37	0.459	72	0
2020-06-28 06:37:00	0	0.199	34	0	0	0.256	37	0.459	72	0
2020-06-28 06:37:00	0	0.199	34	0	0	0.256	37	0.459	72	0
2020-06-28 06:37:00	0	0.201	34	0	0	0.256	37	0.459	71	0
2020-06-28 06:37:00	0	0.201	34	0	0	0.256	37	0.459	71	0
2020-06-28 06:37:00	0	0.201	34	0	0	0.256	37	0.459	71	0
2020-06-28 06:37:00	0	0.201	34	0	0	0.256	37	0.459	72	0
2020-06-28 06:37:00	0	0.201	34	0	0	0.256	37	0.459	72	0
2020-06-28 06:37:00	0	0.199	34	0	0	0.256	36	0.459	71	0
2020-06-28 06:37:00	0	0.199	34	0	0	0.256	37	0.459	72	0
2020-06-28 06:37:00	0	0.2	34	0	0	0.256	37	0.458	71	0
2020-06-28 06:37:00	0	0.2	34	0	0	0.256	49	0.458	72	0
2020-06-28 06:37:00	0	0.2	34	0	0	0.319	53	0.459	71	0
2020-06-28 06:37:00	0	0.2	34	0	0	0.319	53	0.459	72	0
2020-06-28 06:37:00	0	0.201	34	0	0	0.319	53	0.459	87	0
2020-06-28 06:37:00	0	0.201	34	0	0	0.317	53	0.522	88	0
2020-06-28 06:37:00	0	0.2	34	0	0	0.317	53	0.522	88	0
2020-06-28 06:37:00	0	0.2	34	0	0	0.317	53	0.523	88	0
2020-06-28 06:37:00	0	0.2	34	0	0	0.314	53	0.523	88	0
2020-06-28 06:37:00	0	0.2	34	0	0	0.314	53	0.519	87	0
2020-06-28 06:37:00	0	0.201	34	0	0	0.315	53	0.519	87	0
2020-06-28 06:37:00	0	0.201	34	0	0	0.315	53	0.52	88	0
2020-06-28 06:37:00	0	0.199	34	0	0	0.315	54	0.52	88	0
2020-06-28 06:37:00	0	0.199	34	0	0	0.316	53	0.52	88	0
2020-06-28 06:37:00	0	0.2	34	0	0	0.316	54	0.521	88	0
2020-06-28 06:37:00	0	0.2	34	0	0	0.316	54	0.521	88	0
2020-06-28 06:37:00	0	0.201	34	0	0	0.317	54	0.52	88	0
2020-06-28 06:37:00	0	0.201	34	0	0	0.317	47	0.52	88	0
2020-06-28 06:37:00	0	0.2	34	0	0	0.259	38	0.522	88	0
2020-06-28 06:37:00	0	0.2	34	0	0	0.259	38	0.522	88	0
2020-06-28 06:37:00	0	0.2	34	0	0	0.259	36	0.465	73	0
2020-06-28 06:37:00	0	0.2	34	0	0	0.254	36	0.465	71	0
2020-06-28 06:37:00	0	0.199	34	0	0	0.254	36	0.465	71	0
2020-06-28 06:37:00	0	0.199	34	0	0	0.254	37	0.458	71	0
2020-06-28 06:37:00	0	0.2	34	0	0	0.255	36	0.458	71	0
2020-06-28 06:37:00	0	0.2	34	0	0	0.255	36	0.46	71	0
2020-06-28 06:37:00	0	0.201	34	0	0	0.255	36	0.46	71	0
2020-06-28 06:37:00	0	0.201	34	0	0	0.254	36	0.456	71	0
2020-06-28 06:37:00	0	0.2	34	0	0	0.254	37	0.456	71	0
2020-06-28 06:37:00	0	0.2	34	0	0	0.254	37	0.456	71	0
2020-06-28 06:37:00	0	0.2	40	0	0	0.255	37	0.458	71	0
2020-06-28 06:38:00	0	0.214	35	0	0	0.255	37	0.458	72	0
2020-06-28 06:38:00	0	0.214	34	0	0	0.256	37	0.46	77	0
2020-06-28 06:38:00	0	0.201	33	0	0	0.256	36	0.46	77	0
2020-06-28 06:38:00	0	0.201	34	0	0	0.256	36	0.459	72	0
2020-06-28 06:38:00	0	0.2	34	0	0	0.255	37	0.459	71	0
2020-06-28 06:38:00	0	0.2	34	0	0	0.255	36	0.459	71	0
2020-06-28 06:38:00	0	0.2	34	0	0	0.255	37	0.459	71	0
2020-06-28 06:38:00	0	0.2	34	0	0	0.255	37	0.459	71	0
2020-06-28 06:38:00	0	0.199	34	0	0	0.255	36	0.458	71	0
2020-06-28 06:38:00	0	0.199	34	0	0	0.255	36	0.458	71	0
2020-06-28 06:38:00	0	0.2	34	0	0	0.255	36	0.458	71	0
2020-06-28 06:38:00	0	0.2	34	0	0	0.255	37	0.458	71	0
2020-06-28 06:38:00	0	0.199	34	0	0	0.255	38	0.458	71	0
2020-06-28 06:38:00	0	0.199	34	0	0	0.259	37	0.458	72	0
2020-06-28 06:38:00	0	0.199	34	0	0	0.259	36	0.458	73	0
2020-06-28 06:38:00	0	0.199	34	0	0	0.259	38	0.461	71	0
2020-06-28 06:38:00	0	0.199	34	0	0	0.26	37	0.461	70	0
2020-06-28 06:38:00	0	0.2	34	0	0	0.26	37	0.46	72	0
2020-06-28 06:38:00	0	0.2	34	0	0	0.26	37	0.46	72	0
2020-06-28 06:38:00	0	0.199	34	0	0	0.256	37	0.46	71	0
2020-06-28 06:38:00	0	0.199	34	0	0	0.256	37	0.459	71	0
2020-06-28 06:38:00	0	0.201	34	0	0	0.256	37	0.459	73	0
2020-06-28 06:38:00	0	0.201	34	0	0	0.256	36	0.46	72	0
2020-06-28 06:38:00	0	0.199	34	0	0	0.256	36	0.46	71	0
2020-06-28 06:38:00	0	0.199	34	0	0	0.253	36	0.456	71	0
2020-06-28 06:38:00	0	0.2	34	0	0	0.253	36	0.456	71	0
2020-06-28 06:38:00	0	0.2	34	0	0	0.253	37	0.456	71	0
2020-06-28 06:38:00	0	0.201	34	0	0	0.256	37	0.457	71	0
2020-06-28 06:38:00	0	0.201	34	0	0	0.256	37	0.457	71	0
2020-06-28 06:38:00	0	0.199	34	0	0	0.256	41	0.46	71	0
2020-06-28 06:38:00	0	0.199	34	0	0	0.305	54	0.46	72	0
2020-06-28 06:38:00	0	0.201	34	0	0	0.305	54	0.467	74	0
2020-06-28 06:38:00	0	0.201	34	0	0	0.305	53	0.467	88	0
2020-06-28 06:38:00	0	0.201	34	0	0	0.314	53	0.467	88	0
2020-06-28 06:38:00	0	0.201	34	0	0	0.314	78	0.521	88	0
2020-06-28 06:38:00	0	0.198	34	0	0	0.394	67	0.521	88	0
2020-06-28 06:38:00	0	0.198	33	0	0	0.394	60	0.579	110	0
2020-06-28 06:38:00	0	0.201	34	0	0	0.394	57	0.563	100	0
2020-06-28 06:38:00	0	0.201	34	0	0	0.329	55	0.563	95	0
2020-06-28 06:38:00	0	0.201	34	0	0	0.329	63	0.535	89	0
2020-06-28 06:38:00	0	0.201	34	0	0	0.339	54	0.535	95	0
2020-06-28 06:38:00	0	0.201	34	0	0	0.339	53	0.535	95	0
2020-06-28 06:38:00	0	0.201	34	0	0	0.339	54	0.526	91	0
2020-06-28 06:38:00	0	0.198	34	0	0	0.319	55	0.526	88	0
2020-06-28 06:38:00	0	0.198	35	0	0	0.319	54	0.521	88	0
2020-06-28 06:38:00	0	0.2	34	0	0	0.32	54	0.521	88	0
2020-06-28 06:38:00	0	0.2	34	0	0	0.32	41	0.525	88	0
2020-06-28 06:38:00	0	0.2	34	0	0	0.32	37	0.525	88	0
2020-06-28 06:38:00	0	0.2	34	0	0	0.259	38	0.464	73	0
2020-06-28 06:38:00	0	0.2	33	0	0	0.259	37	0.464	72	0
2020-06-28 06:38:00	0	0.2	34	0	0	0.259	38	0.464	72	0
2020-06-28 06:38:00	0	0.199	33	0	0	0.26	38	0.46	73	0
2020-06-28 06:38:00	0	0.199	39	0	0	0.26	37	0.46	72	0
2020-06-28 06:38:00	0	0.251	41	0	0	0.26	37	0.459	71	0
2020-06-28 06:38:00	0	0.251	38	0	0	0.256	37	0.459	71	0
2020-06-28 06:38:00	0	0.2	34	0	0	0.256	37	0.47	73	0
2020-06-28 06:38:00	0	0.2	34	0	0	0.256	37	0.47	72	0
2020-06-28 06:38:00	0	0.204	34	0	0	0.255	36	0.47	72	0
2020-06-28 06:39:00	0	0.204	34	0	0	0.255	37	0.46	72	0
2020-06-28 06:39:00	0	0.2	33	0	0	0.255	36	0.46	71	0
2020-06-28 06:39:00	0	0.2	34	0	0	0.255	36	0.458	71	0
2020-06-28 06:39:00	0	0.201	34	0	0	0.255	37	0.458	71	0
2020-06-28 06:39:00	0	0.201	34	0	0	0.255	36	0.46	71	0
2020-06-28 06:39:00	0	0.199	34	0	0	0.254	36	0.46	71	0
2020-06-28 06:39:00	0	0.199	34	0	0	0.254	37	0.46	71	0
2020-06-28 06:39:00	0	0.2	34	0	0	0.258	38	0.459	72	0
2020-06-28 06:39:00	0	0.2	33	0	0	0.258	37	0.459	72	0
2020-06-28 06:39:00	0	0.2	34	0	0	0.258	38	0.463	71	0
2020-06-28 06:39:00	0	0.2	33	0	0	0.267	50	0.463	72	0
2020-06-28 06:39:00	0	0.201	34	0	0	0.267	45	0.469	87	0
2020-06-28 06:39:00	0	0.201	33	0	0	0.267	37	0.469	87	0
2020-06-28 06:39:00	0	0.199	34	0	0	0.255	37	0.469	71	0
2020-06-28 06:39:00	0	0.199	33	0	0	0.255	37	0.456	71	0
2020-06-28 06:39:00	0	0.199	33	0	0	0.255	37	0.456	71	0
2020-06-28 06:39:00	0	0.199	33	0	0	0.256	37	0.459	71	0
2020-06-28 06:39:00	0	0.199	34	0	0	0.256	38	0.459	71	0
2020-06-28 06:39:00	0	0.199	34	0	0	0.264	37	0.459	71	0
2020-06-28 06:39:00	0	0.201	34	0	0	0.264	54	0.459	72	0
2020-06-28 06:39:00	0	0.201	34	0	0	0.264	38	0.459	85	0
2020-06-28 06:39:00	0	0.199	34	0	0	0.26	38	0.502	76	0
2020-06-28 06:39:00	0	0.199	34	0	0	0.26	37	0.502	71	0
2020-06-28 06:39:00	0	0.199	34	0	0	0.26	42	0.464	72	0
2020-06-28 06:39:00	0	0.199	34	0	0	0.276	39	0.464	72	0
2020-06-28 06:39:00	0	0.199	34	0	0	0.276	43	0.488	72	0
2020-06-28 06:39:00	0	0.199	34	0	0	0.276	36	0.488	76	0
2020-06-28 06:39:00	0	0.201	34	0	0	0.254	36	0.456	71	0
2020-06-28 06:39:00	0	0.201	34	0	0	0.254	36	0.456	71	0
2020-06-28 06:39:00	0	0.2	33	0	0	0.254	36	0.456	71	0
2020-06-28 06:39:00	0	0.2	34	0	0	0.255	36	0.457	71	0
2020-06-28 06:39:00	0	0.2	34	0	0	0.255	54	0.457	71	0
2020-06-28 06:39:00	0	0.2	34	0	0	0.318	53	0.48	72	0
2020-06-28 06:39:00	0	0.2	34	0	0	0.318	66	0.48	87	0
2020-06-28 06:39:00	0	0.201	34	0	0	0.318	65	0.542	90	0
2020-06-28 06:39:00	0	0.201	34	0	0	0.322	55	0.542	100	0
2020-06-28 06:39:00	0	0.201	34	0	0	0.322	55	0.526	92	0
2020-06-28 06:39:00	0	0.201	34	0	0	0.322	56	0.526	92	0
2020-06-28 06:39:00	0	0.2	34	0	0	0.325	56	0.526	88	0
2020-06-28 06:39:00	0	0.2	34	0	0	0.325	55	0.529	90	0
2020-06-28 06:39:00	0	0.199	34	0	0	0.318	53	0.529	90	0
2020-06-28 06:39:00	0	0.199	34	0	0	0.318	53	0.524	89	0
2020-06-28 06:39:00	0	0.199	34	0	0	0.318	53	0.524	88	0
2020-06-28 06:39:00	0	0.199	34	0	0	0.316	53	0.519	88	0
2020-06-28 06:39:00	0	0.199	34	0	0	0.316	56	0.519	87	0
2020-06-28 06:39:00	0	0.199	34	0	0	0.316	53	0.526	87	0
2020-06-28 06:39:00	0	0.199	33	0	0	0.318	52	0.526	89	0
2020-06-28 06:39:00	0	0.199	34	0	0	0.318	49	0.526	88	0
2020-06-28 06:39:00	0	0.199	34	0	0	0.258	38	0.518	85	0
2020-06-28 06:39:00	0	0.199	34	0	0	0.258	37	0.518	73	0
2020-06-28 06:39:00	0	0.199	34	0	0	0.258	37	0.459	72	0
2020-06-28 06:39:00	0	0.199	34	0	0	0.255	36	0.459	71	0
2020-06-28 06:39:00	0	0.199	33	0	0	0.255	36	0.457	71	0
2020-06-28 06:39:00	0	0.199	34	0	0	0.255	36	0.457	71	0
2020-06-28 06:39:00	0	0.2	34	0	0	0.258	37	0.457	71	0
2020-06-28 06:39:00	0	0.2	33	0	0	0.258	38	0.458	73	0
2020-06-28 06:39:00	0	0.2	34	0	0	0.258	36	0.458	72	0
2020-06-28 06:39:00	0	0.203	34	0	0	0.254	36	0.458	71	0
2020-06-28 06:39:00	0	0.2	34	0	0	0.254	37	0.458	71	0
2020-06-28 06:39:00	0	0.2	34	0	0	0.254	37	0.459	71	0
2020-06-28 06:40:00	0	0.202	34	0	0	0.256	37	0.459	71	0
2020-06-28 06:40:00	0	0.202	34	0	0	0.256	37	0.459	71	0
2020-06-28 06:40:00	0	0.2	33	0	0	0.256	37	0.46	72	0
2020-06-28 06:40:00	0	0.2	34	0	0	0.256	37	0.46	71	0
2020-06-28 06:40:00	0	0.199	34	0	0	0.256	38	0.459	71	0
2020-06-28 06:40:00	0	0.199	34	0	0	0.256	38	0.459	72	0
2020-06-28 06:40:00	0	0.2	34	0	0	0.257	37	0.461	72	0
2020-06-28 06:40:00	0	0.2	34	0	0	0.257	37	0.461	71	0
2020-06-28 06:40:00	0	0.199	33	0	0	0.257	37	0.461	72	0
2020-06-28 06:40:00	0	0.199	33	0	0	0.256	37	0.459	71	0
2020-06-28 06:40:00	0	0.199	33	0	0	0.256	37	0.459	71	0
2020-06-28 06:40:00	0	0.199	34	0	0	0.258	37	0.459	72	0
2020-06-28 06:40:00	0	0.198	34	0	0	0.258	36	0.459	72	0
2020-06-28 06:40:00	0	0.198	34	0	0	0.258	37	0.457	71	0
2020-06-28 06:40:00	0	0.199	34	0	0	0.256	37	0.457	71	0
2020-06-28 06:40:00	0	0.199	34	0	0	0.256	37	0.457	72	0
2020-06-28 06:40:00	0	0.2	33	0	0	0.256	37	0.459	71	0
2020-06-28 06:40:00	0	0.2	34	0	0	0.258	37	0.459	71	0
2020-06-28 06:40:00	0	0.2	33	0	0	0.258	37	0.461	72	0
2020-06-28 06:40:00	0	0.2	33	0	0	0.258	36	0.461	71	0
2020-06-28 06:40:00	0	0.2	33	0	0	0.255	37	0.458	71	0
2020-06-28 06:40:00	0	0.2	33	0	0	0.255	37	0.458	71	0
2020-06-28 06:40:00	0	0.201	33	0	0	0.255	37	0.458	71	0
2020-06-28 06:40:00	0	0.201	34	0	0	0.256	37	0.457	71	0
2020-06-28 06:40:00	0	0.2	34	0	0	0.256	38	0.457	71	0
2020-06-28 06:40:00	0	0.2	34	0	0	0.256	38	0.462	72	0
2020-06-28 06:40:00	0	0.2	34	0	0	0.27	38	0.462	73	0
2020-06-28 06:40:00	0	0.198	34	0	0	0.27	38	0.48	80	0
2020-06-28 06:40:00	0	0.198	33	0	0	0.258	37	0.48	72	0
2020-06-28 06:40:00	0	0.2	33	0	0	0.258	45	0.459	72	0
2020-06-28 06:40:00	0	0.2	33	0	0	0.258	54	0.459	76	0
2020-06-28 06:40:00	0	0.199	33	0	0	0.317	53	0.527	87	0
2020-06-28 06:40:00	0	0.199	34	0	0	0.317	54	0.527	87	0
2020-06-28 06:40:00	0	0.2	34	0	0	0.321	55	0.521	87	0
2020-06-28 06:40:00	0	0.2	34	0	0	0.321	55	0.521	88	0
2020-06-28 06:40:00	0	0.199	34	0	0	0.321	54	0.525	89	0
2020-06-28 06:40:00	0	0.199	34	0	0	0.317	54	0.525	88	0
2020-06-28 06:40:00	0	0.2	34	0	0	0.317	53	0.525	88	0
2020-06-28 06:40:00	0	0.2	34	0	0	0.317	54	0.521	88	0
2020-06-28 06:40:00	0	0.2	34	0	0	0.318	53	0.521	88	0
2020-06-28 06:40:00	0	0.2	33	0	0	0.318	53	0.52	88	0
2020-06-28 06:40:00	0	0.199	33	0	0	0.313	53	0.52	87	0
2020-06-28 06:40:00	0	0.199	34	0	0	0.313	54	0.517	87	0
2020-06-28 06:40:00	0	0.2	33	0	0	0.313	55	0.517	87	0
2020-06-28 06:40:00	0	0.2	33	0	0	0.313	52	0.52	87	0
2020-06-28 06:40:00	0	0.2	33	0	0	0.313	55	0.52	87	0
2020-06-28 06:40:00	0	0.2	33	0	0	0.313	37	0.52	89	0
2020-06-28 06:40:00	0	0.199	33	0	0	0.256	37	0.521	70	0
2020-06-28 06:40:00	0	0.199	34	0	0	0.256	38	0.521	71	0
2020-06-28 06:40:00	0	0.201	34	0	0	0.256	38	0.465	73	0
2020-06-28 06:40:00	0	0.201	34	0	0	0.261	38	0.465	73	0
2020-06-28 06:40:00	0	0.199	34	0	0	0.261	38	0.463	72	0
2020-06-28 06:40:00	0	0.199	34	0	0	0.259	37	0.463	73	0
2020-06-28 06:40:00	0	0.198	34	0	0	0.259	37	0.463	72	0
2020-06-28 06:40:00	0	0.198	33	0	0	0.259	37	0.461	71	0
2020-06-28 06:40:00	0	0.2	34	0	0	0.256	37	0.461	71	0
2020-06-28 06:40:00	0	0.2	34	0	0	0.256	37	0.458	71	0
2020-06-28 06:40:00	0	0.199	34	0	0	0.257	37	0.458	71	0
2020-06-28 06:41:00	0	0.199	34	0	0	0.257	38	0.46	71	0
2020-06-28 06:41:00	0	0.2	34	0	0	0.257	37	0.46	72	0
2020-06-28 06:41:00	0	0.2	34	0	0	0.255	37	0.463	72	0
2020-06-28 06:41:00	0	0.2	34	0	0	0.255	37	0.463	71	0
2020-06-28 06:41:00	0	0.2	34	0	0	0.255	38	0.463	71	0
2020-06-28 06:41:00	0	0.199	34	0	0	0.26	38	0.462	72	0
2020-06-28 06:41:00	0	0.199	34	0	0	0.26	38	0.462	72	0
2020-06-28 06:41:00	0	0.201	33	0	0	0.26	38	0.463	73	0
2020-06-28 06:41:00	0	0.201	34	0	0	0.261	38	0.463	72	0
2020-06-28 06:41:00	0	0.205	39	0	0	0.261	37	0.464	72	0
2020-06-28 06:41:00	0	0.205	34	0	0	0.261	37	0.464	72	0
2020-06-28 06:41:00	0	0.199	33	0	0	0.256	37	0.464	77	0
2020-06-28 06:41:00	0	0.199	33	0	0	0.256	37	0.474	71	0
2020-06-28 06:41:00	0	0.201	34	0	0	0.256	37	0.474	71	0
2020-06-28 06:41:00	0	0.201	33	0	0	0.257	37	0.459	72	0
2020-06-28 06:41:00	0	0.2	34	0	0	0.257	38	0.459	71	0
2020-06-28 06:41:00	0	0.2	33	0	0	0.257	37	0.463	72	0
2020-06-28 06:41:00	0	0.2	34	0	0	0.26	38	0.463	72	0
2020-06-28 06:41:00	0	0.2	33	0	0	0.26	38	0.463	74	0
2020-06-28 06:41:00	0	0.197	33	0	0	0.26	37	0.464	73	0
2020-06-28 06:41:00	0	0.197	33	0	0	0.26	37	0.464	73	0
2020-06-28 06:41:00	0	0.2	34	0	0	0.26	36	0.461	73	0
2020-06-28 06:41:00	0	0.2	34	0	0	0.26	36	0.461	72	0
2020-06-28 06:41:00	0	0.199	33	0	0	0.254	36	0.455	70	0
2020-06-28 06:41:00	0	0.199	33	0	0	0.254	36	0.455	71	0
2020-06-28 06:41:00	0	0.199	34	0	0	0.255	36	0.455	71	0
2020-06-28 06:41:00	0	0.199	33	0	0	0.255	36	0.456	71	0
2020-06-28 06:41:00	0	0.199	33	0	0	0.255	36	0.456	71	0
2020-06-28 06:41:00	0	0.199	34	0	0	0.255	36	0.456	71	0
2020-06-28 06:41:00	0	0.199	33	0	0	0.255	37	0.456	70	0
2020-06-28 06:41:00	0	0.199	33	0	0	0.255	43	0.457	71	0
2020-06-28 06:41:00	0	0.2	34	0	0	0.315	59	0.457	71	0
2020-06-28 06:41:00	0	0.2	33	0	0	0.315	53	0.457	72	0
2020-06-28 06:41:00	0	0.199	34	0	0	0.316	53	0.523	89	0
2020-06-28 06:41:00	0	0.199	34	0	0	0.316	53	0.523	87	0
2020-06-28 06:41:00	0	0.2	34	0	0	0.316	53	0.52	87	0
2020-06-28 06:41:00	0	0.2	34	0	0	0.317	53	0.52	87	0
2020-06-28 06:41:00	0	0.199	33	0	0	0.317	55	0.521	87	0
2020-06-28 06:41:00	0	0.199	33	0	0	0.317	53	0.521	87	0
2020-06-28 06:41:00	0	0.199	34	0	0	0.32	53	0.524	89	0
2020-06-28 06:41:00	0	0.199	33	0	0	0.32	53	0.524	89	0
2020-06-28 06:41:00	0	0.199	34	0	0	0.314	53	0.524	87	0
2020-06-28 06:41:00	0	0.199	33	0	0	0.314	54	0.519	87	0
2020-06-28 06:41:00	0	0.199	33	0	0	0.314	54	0.519	87	0
2020-06-28 06:41:00	0	0.199	34	0	0	0.318	53	0.522	88	0
2020-06-28 06:41:00	0	0.199	33	0	0	0.318	54	0.522	88	0
2020-06-28 06:41:00	0	0.199	34	0	0	0.304	53	0.504	85	0
2020-06-28 06:41:00	0	0.199	33	0	0	0.304	37	0.504	87	0
2020-06-28 06:41:00	0	0.198	33	0	0	0.304	37	0.508	87	0
2020-06-28 06:41:00	0	0.198	33	0	0	0.257	37	0.508	71	0
2020-06-28 06:41:00	0	0.199	34	0	0	0.257	37	0.508	71	0
2020-06-28 06:41:00	0	0.199	33	0	0	0.257	37	0.46	71	0
2020-06-28 06:41:00	0	0.2	34	0	0	0.256	37	0.46	71	0
2020-06-28 06:41:00	0	0.2	34	0	0	0.256	37	0.459	71	0
2020-06-28 06:41:00	0	0.199	33	0	0	0.256	37	0.459	71	0
2020-06-28 06:41:00	0	0.199	33	0	0	0.256	37	0.458	71	0
2020-06-28 06:41:00	0	0.199	34	0	0	0.256	37	0.458	71	0
2020-06-28 06:41:00	0	0.199	33	0	0	0.256	37	0.458	71	0
2020-06-28 06:41:00	0	0.198	34	0	0	0.256	37	0.458	71	0
2020-06-28 06:41:00	0	0.198	34	0	0	0.256	37	0.458	71	0
2020-06-28 06:42:00	0	0.199	34	0	0	0.256	36	0.459	71	0
2020-06-28 06:42:00	0	0.199	34	0	0	0.255	36	0.459	71	0
2020-06-28 06:42:00	0	0.199	33	0	0	0.255	36	0.457	70	0
2020-06-28 06:42:00	0	0.199	33	0	0	0.255	36	0.457	71	0
2020-06-28 06:42:00	0	0.2	33	0	0	0.255	37	0.457	70	0
2020-06-28 06:42:00	0	0.2	33	0	0	0.255	36	0.458	71	0
2020-06-28 06:42:00	0	0.2	34	0	0	0.256	37	0.458	71	0
2020-06-28 06:42:00	0	0.2	34	0	0	0.256	37	0.457	71	0
2020-06-28 06:42:00	0	0.2	34	0	0	0.256	37	0.457	71	0
2020-06-28 06:42:00	0	0.2	34	0	0	0.261	38	0.457	71	0
2020-06-28 06:42:00	0	0.199	34	0	0	0.261	39	0.459	71	0
2020-06-28 06:42:00	0	0.199	34	0	0	0.261	36	0.459	73	0
2020-06-28 06:42:00	0	0.199	34	0	0	0.255	36	0.464	71	0
2020-06-28 06:42:00	0	0.199	34	0	0	0.255	37	0.464	71	0
2020-06-28 06:42:00	0	0.2	33	0	0	0.255	37	0.457	71	0
2020-06-28 06:42:00	0	0.2	33	0	0	0.255	37	0.457	71	0
2020-06-28 06:42:00	0	0.198	33	0	0	0.255	38	0.458	71	0
2020-06-28 06:42:00	0	0.198	33	0	0	0.255	37	0.458	71	0
2020-06-28 06:42:00	0	0.2	34	0	0	0.256	37	0.458	72	0
2020-06-28 06:42:00	0	0.2	33	0	0	0.256	37	0.459	71	0
2020-06-28 06:42:00	0	0.199	33	0	0	0.256	37	0.459	71	0
2020-06-28 06:42:00	0	0.199	34	0	0	0.256	37	0.459	71	0
2020-06-28 06:42:00	0	0.2	33	0	0	0.256	37	0.459	71	0
2020-06-28 06:42:00	0	0.2	34	0	0	0.256	37	0.459	71	0
2020-06-28 06:42:00	0	0.199	33	0	0	0.256	37	0.459	72	0
2020-06-28 06:42:00	0	0.199	34	0	0	0.256	37	0.458	71	0
2020-06-28 06:42:00	0	0.199	34	0	0	0.256	37	0.458	71	0
2020-06-28 06:42:00	0	0.198	34	0	0	0.256	37	0.459	71	0
2020-06-28 06:42:00	0	0.2	33	0	0	0.256	37	0.459	71	0
2020-06-28 06:42:00	0	0.2	33	0	0	0.272	42	0.459	71	0
2020-06-28 06:42:00	0	0.2	33	0	0	0.272	54	0.458	73	0
2020-06-28 06:42:00	0	0.198	37	0	0	0.272	54	0.458	88	0
2020-06-28 06:42:00	0	0.198	37	0	0	0.315	53	0.55	88	0
2020-06-28 06:42:00	0	0.2	33	0	0	0.315	52	0.55	94	0
2020-06-28 06:42:00	0	0.2	34	0	0	0.315	52	0.518	87	0
2020-06-28 06:42:00	0	0.2	33	0	0	0.312	53	0.518	87	0
2020-06-28 06:42:00	0	0.2	34	0	0	0.312	53	0.519	87	0
2020-06-28 06:42:00	0	0.199	33	0	0	0.318	54	0.519	87	0
2020-06-28 06:42:00	0	0.199	34	0	0	0.318	53	0.519	87	0
2020-06-28 06:42:00	0	0.199	33	0	0	0.318	53	0.522	88	0
2020-06-28 06:42:00	0	0.2	33	0	0	0.315	53	0.522	87	0
2020-06-28 06:42:00	0	0.2	34	0	0	0.315	53	0.519	87	0
2020-06-28 06:42:00	0	0.2	34	0	0	0.319	53	0.519	88	0
2020-06-28 06:42:00	0	0.2	33	0	0	0.319	48	0.52	88	0
2020-06-28 06:42:00	0	0.2	33	0	0	0.319	54	0.52	88	0
2020-06-28 06:42:00	0	0.199	33	0	0	0.313	51	0.522	85	0
2020-06-28 06:42:00	0	0.199	33	0	0	0.313	50	0.522	87	0
2020-06-28 06:42:00	0	0.2	33	0	0	0.313	37	0.522	79	0
2020-06-28 06:42:00	0	0.2	34	0	0	0.254	36	0.461	71	0
2020-06-28 06:42:00	0	0.198	33	0	0	0.254	36	0.461	71	0
2020-06-28 06:42:00	0	0.198	34	0	0	0.254	36	0.455	70	0
2020-06-28 06:42:00	0	0.2	33	0	0	0.256	37	0.455	71	0
2020-06-28 06:42:00	0	0.2	33	0	0	0.256	37	0.458	71	0
2020-06-28 06:42:00	0	0.199	33	0	0	0.256	37	0.458	71	0
2020-06-28 06:42:00	0	0.199	33	0	0	0.255	36	0.458	70	0
2020-06-28 06:42:00	0	0.199	33	0	0	0.255	37	0.457	71	0
2020-06-28 06:42:00	0	0.199	33	0	0	0.255	37	0.457	71	0
2020-06-28 06:42:00	0	0.199	34	0	0	0.256	37	0.458	71	0
2020-06-28 06:43:00	0	0.199	34	0	0	0.256	37	0.458	71	0
2020-06-28 06:43:00	0	0.201	34	0	0	0.256	37	0.459	71	0
2020-06-28 06:43:00	0	0.201	34	0	0	0.256	37	0.459	71	0
2020-06-28 06:43:00	0	0.201	34	0	0	0.256	37	0.459	71	0
2020-06-28 06:43:00	0	0.201	34	0	0	0.256	37	0.459	71	0
2020-06-28 06:43:00	0	0.199	33	0	0	0.256	37	0.459	71	0
2020-06-28 06:43:00	0	0.199	34	0	0	0.256	37	0.458	71	0
2020-06-28 06:43:00	0	0.199	33	0	0	0.256	37	0.458	71	0
2020-06-28 06:43:00	0	0.199	33	0	0	0.256	37	0.458	71	0
2020-06-28 06:43:00	0	0.199	33	0	0	0.256	37	0.458	71	0
2020-06-28 06:43:00	0	0.199	33	0	0	0.256	37	0.458	71	0
2020-06-28 06:43:00	0	0.2	33	0	0	0.256	37	0.459	71	0
2020-06-28 06:43:00	0	0.2	33	0	0	0.256	37	0.459	71	0
2020-06-28 06:43:00	0	0.199	33	0	0	0.255	37	0.457	71	0
2020-06-28 06:43:00	0	0.199	34	0	0	0.255	36	0.457	71	0
2020-06-28 06:43:00	0	0.2	33	0	0	0.255	37	0.456	71	0
2020-06-28 06:43:00	0	0.2	33	0	0	0.255	36	0.456	71	0
2020-06-28 06:43:00	0	0.199	33	0	0	0.255	37	0.456	71	0
2020-06-28 06:43:00	0	0.199	33	0	0	0.255	37	0.456	72	0
2020-06-28 06:43:00	0	0.198	33	0	0	0.256	37	0.456	71	0
2020-06-28 06:43:00	0	0.198	33	0	0	0.256	37	0.458	71	0
2020-06-28 06:43:00	0	0.2	34	0	0	0.256	37	0.458	71	0
2020-06-28 06:43:00	0	0.2	33	0	0	0.256	37	0.458	71	0
2020-06-28 06:43:00	0	0.199	33	0	0	0.256	41	0.458	71	0
2020-06-28 06:43:00	0	0.199	33	0	0	0.266	38	0.46	71	0
2020-06-28 06:43:00	0	0.2	33	0	0	0.266	42	0.46	73	0
2020-06-28 06:43:00	0	0.2	33	0	0	0.266	37	0.46	73	0
2020-06-28 06:43:00	0	0.198	33	0	0	0.257	37	0.464	72	0
2020-06-28 06:43:00	0	0.198	33	0	0	0.257	37	0.464	71	0
2020-06-28 06:43:00	0	0.199	33	0	0	0.257	37	0.459	71	0
2020-06-28 06:43:00	0	0.199	33	0	0	0.256	42	0.459	71	0
2020-06-28 06:43:00	0	0.2	33	0	0	0.256	55	0.459	71	0
2020-06-28 06:43:00	0	0.2	33	0	0	0.256	53	0.459	72	0
2020-06-28 06:43:00	0	0.199	33	0	0	0.316	53	0.459	88	0
2020-06-28 06:43:00	0	0.199	33	0	0	0.316	53	0.519	87	0
2020-06-28 06:43:00	0	0.2	34	0	0	0.315	53	0.519	87	0
2020-06-28 06:43:00	0	0.2	34	0	0	0.315	52	0.519	87	0
2020-06-28 06:43:00	0	0.198	33	0	0	0.315	53	0.519	87	0
2020-06-28 06:43:00	0	0.198	33	0	0	0.313	53	0.516	87	0
2020-06-28 06:43:00	0	0.199	34	0	0	0.313	53	0.516	87	0
2020-06-28 06:43:00	0	0.199	33	0	0	0.313	53	0.516	87	0
2020-06-28 06:43:00	0	0.199	34	0	0	0.314	53	0.516	87	0
2020-06-28 06:43:00	0	0.199	33	0	0	0.314	53	0.516	87	0
2020-06-28 06:43:00	0	0.201	34	0	0	0.315	53	0.518	87	0
2020-06-28 06:43:00	0	0.201	34	0	0	0.315	54	0.518	87	0
2020-06-28 06:43:00	0	0.199	34	0	0	0.315	53	0.52	88	0
2020-06-28 06:43:00	0	0.199	33	0	0	0.315	52	0.52	88	0
2020-06-28 06:43:00	0	0.199	33	0	0	0.315	55	0.519	88	0
2020-06-28 06:43:00	0	0.198	33	0	0	0.315	46	0.519	87	0
2020-06-28 06:43:00	0	0.198	34	0	0	0.291	47	0.502	82	0
2020-06-28 06:43:00	0	0.2	34	0	0	0.291	37	0.502	81	0
2020-06-28 06:43:00	0	0.2	33	0	0	0.256	37	0.502	81	0
2020-06-28 06:43:00	0	0.198	33	0	0	0.256	37	0.461	71	0
2020-06-28 06:43:00	0	0.198	33	0	0	0.256	37	0.461	71	0
2020-06-28 06:43:00	0	0.2	34	0	0	0.256	37	0.458	71	0
2020-06-28 06:43:00	0	0.2	33	0	0	0.256	41	0.458	71	0
2020-06-28 06:43:00	0	0.2	33	0	0	0.256	39	0.462	71	0
2020-06-28 06:43:00	0	0.2	33	0	0	0.256	37	0.462	71	0
2020-06-28 06:43:00	0	0.198	33	0	0	0.256	38	0.462	71	0
2020-06-28 06:43:00	0	0.198	33	0	0	0.256	38	0.458	72	0
2020-06-28 06:44:00	0	0.2	33	0	0	0.26	38	0.458	73	0
2020-06-28 06:44:00	0	0.2	34	0	0	0.26	37	0.463	73	0
2020-06-28 06:44:00	0	0.199	34	0	0	0.26	38	0.463	72	0
2020-06-28 06:44:00	0	0.199	33	0	0	0.256	36	0.46	72	0
2020-06-28 06:44:00	0	0.198	33	0	0	0.256	36	0.46	71	0
2020-06-28 06:44:00	0	0.198	33	0	0	0.256	36	0.46	71	0
2020-06-28 06:44:00	0	0.198	33	0	0	0.255	36	0.457	71	0
2020-06-28 06:44:00	0	0.198	34	0	0	0.255	37	0.457	70	0
2020-06-28 06:44:00	0	0.199	33	0	0	0.255	36	0.456	71	0
2020-06-28 06:44:00	0	0.199	34	0	0	0.255	36	0.456	71	0
2020-06-28 06:44:00	0	0.198	33	0	0	0.255	37	0.458	71	0
2020-06-28 06:44:00	0	0.198	33	0	0	0.255	36	0.458	71	0
2020-06-28 06:44:00	0	0.199	34	0	0	0.255	37	0.458	71	0
2020-06-28 06:44:00	0	0.199	33	0	0	0.255	38	0.457	71	0
2020-06-28 06:44:00	0	0.199	33	0	0	0.255	38	0.457	72	0
2020-06-28 06:44:00	0	0.199	34	0	0	0.256	36	0.463	72	0
2020-06-28 06:44:00	0	0.199	34	0	0	0.256	36	0.463	70	0
2020-06-28 06:44:00	0	0.199	33	0	0	0.259	37	0.455	71	0
2020-06-28 06:44:00	0	0.198	34	0	0	0.259	37	0.455	71	0
2020-06-28 06:44:00	0	0.198	34	0	0	0.259	36	0.455	71	0
2020-06-28 06:44:00	0	0.198	33	0	0	0.256	37	0.455	71	0
2020-06-28 06:44:00	0	0.198	34	0	0	0.256	37	0.461	71	0
2020-06-28 06:44:00	0	0.198	34	0	0	0.256	37	0.461	71	0
2020-06-28 06:44:00	0	0.198	34	0	0	0.256	37	0.458	71	0
2020-06-28 06:44:00	0	0.199	34	0	0	0.256	37	0.458	71	0
2020-06-28 06:44:00	0	0.199	33	0	0	0.256	37	0.458	71	0
2020-06-28 06:44:00	0	0.198	33	0	0	0.256	37	0.458	71	0
2020-06-28 06:44:00	0	0.198	33	0	0	0.256	36	0.458	71	0
2020-06-28 06:44:00	0	0.198	33	0	0	0.256	36	0.457	71	0
2020-06-28 06:44:00	0	0.198	33	0	0	0.255	36	0.457	70	0
2020-06-28 06:44:00	0	0.199	34	0	0	0.255	54	0.477	71	0
2020-06-28 06:44:00	0	0.199	34	0	0	0.314	53	0.477	88	0
2020-06-28 06:44:00	0	0.202	34	0	0	0.314	53	0.477	88	0
2020-06-28 06:44:00	0	0.202	34	0	0	0.314	54	0.519	87	0
2020-06-28 06:44:00	0	0.2	33	0	0	0.313	53	0.519	88	0
2020-06-28 06:44:00	0	0.2	33	0	0	0.313	53	0.515	87	0
2020-06-28 06:44:00	0	0.2	33	0	0	0.313	52	0.515	87	0
2020-06-28 06:44:00	0	0.199	33	0	0	0.312	52	0.516	87	0
2020-06-28 06:44:00	0	0.199	34	0	0	0.312	52	0.516	87	0
2020-06-28 06:44:00	0	0.198	33	0	0	0.314	53	0.515	86	0
2020-06-28 06:44:00	0	0.198	34	0	0	0.314	53	0.515	87	0
2020-06-28 06:44:00	0	0.197	33	0	0	0.314	53	0.515	88	0
2020-06-28 06:44:00	0	0.197	33	0	0	0.317	53	0.517	87	0
2020-06-28 06:44:00	0	0.2	34	0	0	0.317	53	0.517	87	0
2020-06-28 06:44:00	0	0.2	33	0	0	0.314	54	0.523	88	0
2020-06-28 06:44:00	0	0.199	34	0	0	0.314	53	0.523	86	0
2020-06-28 06:44:00	0	0.199	34	0	0	0.314	37	0.521	88	0
2020-06-28 06:44:00	0	0.199	34	0	0	0.255	36	0.521	75	0
2020-06-28 06:44:00	0	0.199	33	0	0	0.255	36	0.521	70	0
2020-06-28 06:44:00	0	0.201	34	0	0	0.255	36	0.455	70	0
2020-06-28 06:44:00	0	0.201	33	0	0	0.254	37	0.455	70	0
2020-06-28 06:44:00	0	0.198	34	0	0	0.254	37	0.454	71	0
2020-06-28 06:44:00	0	0.198	34	0	0	0.254	37	0.454	70	0
2020-06-28 06:44:00	0	0.199	34	0	0	0.257	37	0.46	72	0
2020-06-28 06:44:00	0	0.199	46	0	0	0.257	37	0.46	72	0
2020-06-28 06:44:00	0	0.199	34	0	0	0.257	37	0.458	71	0
2020-06-28 06:44:00	0	0.199	33	0	0	0.256	37	0.458	71	0
2020-06-28 06:44:00	0	0.201	34	0	0	0.256	37	0.458	71	0
2020-06-28 06:45:00	0	0.201	34	0	0	0.256	37	0.458	71	0
2020-06-28 06:45:00	0	0.2	34	0	0	0.263	37	0.458	72	0
2020-06-28 06:45:00	0	0.2	34	0	0	0.263	37	0.459	72	0
2020-06-28 06:45:00	0	0.199	33	0	0	0.263	37	0.459	71	0
2020-06-28 06:45:00	0	0.199	34	0	0	0.255	36	0.456	71	0
2020-06-28 06:45:00	0	0.199	33	0	0	0.255	36	0.456	70	0
2020-06-28 06:45:00	0	0.199	34	0	0	0.255	36	0.456	70	0
2020-06-28 06:45:00	0	0.199	34	0	0	0.254	37	0.456	71	0
2020-06-28 06:45:00	0	0.199	33	0	0	0.254	37	0.456	71	0
2020-06-28 06:45:00	0	0.199	33	0	0	0.269	43	0.469	72	0
2020-06-28 06:45:00	0	0.199	34	0	0	0.269	36	0.469	73	0
2020-06-28 06:45:00	0	0.198	33	0	0	0.269	37	0.456	71	0
2020-06-28 06:45:00	0	0.198	33	0	0	0.256	37	0.456	71	0
2020-06-28 06:45:00	0	0.199	34	0	0	0.256	37	0.456	71	0
2020-06-28 06:45:00	0	0.199	33	0	0	0.256	37	0.458	71	0
2020-06-28 06:45:00	0	0.2	33	0	0	0.256	37	0.458	71	0
2020-06-28 06:45:00	0	0.2	33	0	0	0.256	37	0.458	71	0
2020-06-28 06:45:00	0	0.197	33	0	0	0.256	37	0.458	71	0
2020-06-28 06:45:00	0	0.197	33	0	0	0.257	37	0.458	72	0
2020-06-28 06:45:00	0	0.199	34	0	0	0.257	37	0.46	71	0
2020-06-28 06:45:00	0	0.199	33	0	0	0.257	36	0.46	70	0
2020-06-28 06:45:00	0	0.199	34	0	0	0.255	36	0.456	71	0
2020-06-28 06:45:00	0	0.199	33	0	0	0.255	36	0.456	71	0
2020-06-28 06:45:00	0	0.198	33	0	0	0.255	37	0.456	71	0
2020-06-28 06:45:00	0	0.198	33	0	0	0.256	36	0.456	71	0
2020-06-28 06:45:00	0	0.199	33	0	0	0.256	36	0.456	71	0
2020-06-28 06:45:00	0	0.199	34	0	0	0.256	36	0.456	71	0
2020-06-28 06:45:00	0	0.197	34	0	0	0.258	38	0.456	72	0
2020-06-28 06:45:00	0	0.197	34	0	0	0.258	37	0.46	71	0
2020-06-28 06:45:00	0	0.198	33	0	0	0.258	37	0.46	71	0
2020-06-28 06:45:00	0	0.198	33	0	0	0.256	37	0.458	71	0
2020-06-28 06:45:00	0	0.199	34	0	0	0.256	53	0.458	71	0
2020-06-28 06:45:00	0	0.199	34	0	0	0.318	53	0.458	71	0
2020-06-28 06:45:00	0	0.197	33	0	0	0.318	53	0.52	87	0
2020-06-28 06:45:00	0	0.197	33	0	0	0.318	54	0.52	87	0
2020-06-28 06:45:00	0	0.199	34	0	0	0.317	52	0.522	88	0
2020-06-28 06:45:00	0	0.199	34	0	0	0.317	52	0.522	86	0
2020-06-28 06:45:00	0	0.198	33	0	0	0.312	52	0.516	86	0
2020-06-28 06:45:00	0	0.198	33	0	0	0.312	52	0.516	86	0
2020-06-28 06:45:00	0	0.199	34	0	0	0.312	53	0.518	87	0
2020-06-28 06:45:00	0	0.199	33	0	0	0.316	53	0.518	87	0
2020-06-28 06:45:00	0	0.199	34	0	0	0.316	53	0.518	87	0
2020-06-28 06:45:00	0	0.198	33	0	0	0.313	53	0.517	87	0
2020-06-28 06:45:00	0	0.198	33	0	0	0.313	53	0.517	87	0
2020-06-28 06:45:00	0	0.198	34	0	0	0.313	54	0.517	87	0
2020-06-28 06:45:00	0	0.198	33	0	0	0.306	53	0.517	87	0
2020-06-28 06:45:00	0	0.199	34	0	0	0.306	53	0.503	85	0
2020-06-28 06:45:00	0	0.199	33	0	0	0.306	53	0.503	87	0
2020-06-28 06:45:00	0	0.199	33	0	0	0.267	37	0.488	87	0
2020-06-28 06:45:00	0	0.199	33	0	0	0.267	37	0.488	71	0
2020-06-28 06:45:00	0	0.2	33	0	0	0.267	37	0.488	71	0
2020-06-28 06:45:00	0	0.2	33	0	0	0.255	37	0.457	71	0
2020-06-28 06:45:00	0	0.199	33	0	0	0.255	37	0.457	70	0
2020-06-28 06:45:00	0	0.199	33	0	0	0.256	37	0.456	71	0
2020-06-28 06:45:00	0	0.197	33	0	0	0.256	37	0.456	71	0
2020-06-28 06:45:00	0	0.197	33	0	0	0.256	37	0.458	71	0
2020-06-28 06:45:00	0	0.199	33	0	0	0.256	37	0.458	71	0
2020-06-28 06:45:00	0	0.199	33	0	0	0.256	37	0.458	71	0
2020-06-28 06:45:00	0	0.199	33	0	0	0.256	37	0.458	71	0
2020-06-28 06:45:00	0	0.199	33	0	0	0.256	37	0.458	71	0
2020-06-28 06:46:00	0	0.201	34	0	0	0.256	37	0.459	71	0
2020-06-28 06:46:00	0	0.201	33	0	0	0.256	37	0.459	71	0
2020-06-28 06:46:00	0	0.199	33	0	0	0.256	37	0.457	71	0
2020-06-28 06:46:00	0	0.199	33	0	0	0.256	37	0.457	71	0
2020-06-28 06:46:00	0	0.2	34	0	0	0.256	37	0.457	71	0
2020-06-28 06:46:00	0	0.2	33	0	0	0.256	37	0.458	71	0
2020-06-28 06:46:00	0	0.199	33	0	0	0.256	37	0.458	71	0
2020-06-28 06:46:00	0	0.199	33	0	0	0.256	37	0.458	71	0
2020-06-28 06:46:00	0	0.198	33	0	0	0.256	37	0.458	71	0
2020-06-28 06:46:00	0	0.198	33	0	0	0.256	37	0.458	71	0
2020-06-28 06:46:00	0	0.199	33	0	0	0.315	37	0.458	71	0
2020-06-28 06:46:00	0	0.199	33	0	0	0.255	37	0.458	71	0
2020-06-28 06:46:00	0	0.199	34	0	0	0.255	37	0.458	71	0
2020-06-28 06:46:00	0	0.199	33	0	0	0.255	37	0.457	72	0
2020-06-28 06:46:00	0	0.198	33	0	0	0.256	36	0.461	72	0
2020-06-28 06:46:00	0	0.198	33	0	0	0.256	36	0.461	71	0
2020-06-28 06:46:00	0	0.2	34	0	0	0.256	37	0.457	71	0
2020-06-28 06:46:00	0	0.2	34	0	0	0.255	37	0.457	71	0
2020-06-28 06:46:00	0	0.198	33	0	0	0.255	37	0.457	71	0
2020-06-28 06:46:00	0	0.198	33	0	0	0.256	37	0.458	71	0
2020-06-28 06:46:00	0	0.199	33	0	0	0.256	37	0.458	71	0
2020-06-28 06:46:00	0	0.199	33	0	0	0.256	37	0.458	71	0
2020-06-28 06:46:00	0	0.199	33	0	0	0.256	37	0.458	71	0
2020-06-28 06:46:00	0	0.199	34	0	0	0.256	37	0.458	71	0
2020-06-28 06:46:00	0	0.197	33	0	0	0.256	37	0.458	71	0
2020-06-28 06:46:00	0	0.197	33	0	0	0.255	36	0.458	71	0
2020-06-28 06:46:00	0	0.198	33	0	0	0.255	36	0.456	70	0
2020-06-28 06:46:00	0	0.198	33	0	0	0.255	36	0.456	71	0
2020-06-28 06:46:00	0	0.198	34	0	0	0.255	36	0.456	71	0
2020-06-28 06:46:00	0	0.198	33	0	0	0.255	37	0.456	71	0
2020-06-28 06:46:00	0	0.199	33	0	0	0.255	37	0.458	71	0
2020-06-28 06:46:00	0	0.199	34	0	0	0.257	37	0.458	76	0
2020-06-28 06:48:00	0	0.2	33	0	0	0.257	37	0.457	71	0
2020-06-28 06:48:00	0	0.2	34	0	0	0.257	37	0.457	71	0
2020-06-28 06:48:00	0	0.199	33	0	0	0.256	37	0.457	71	0
2020-06-28 06:48:00	0	0.199	34	0	0	0.256	37	0.458	71	0
2020-06-28 06:48:00	0	0.199	33	0	0	0.256	36	0.458	71	0
2020-06-28 06:48:00	0	0.198	34	0	0	0.255	36	0.457	71	0
2020-06-28 06:48:00	0	0.198	34	0	0	0.255	37	0.457	71	0
2020-06-28 06:48:00	0	0.198	33	0	0	0.258	37	0.456	71	0
2020-06-28 06:48:00	0	0.198	33	0	0	0.258	37	0.456	71	0
2020-06-28 06:48:00	0	0.199	34	0	0	0.258	37	0.456	71	0
2020-06-28 06:49:00	0	0.199	33	0	0	0.256	37	0.458	71	0
2020-06-28 06:49:00	0	0.198	33	0	0	0.256	37	0.458	71	0
2020-06-28 06:49:00	0	0.198	33	0	0	0.256	37	0.458	71	0
2020-06-28 06:49:00	0	0.199	33	0	0	0.256	37	0.458	71	0
2020-06-28 06:49:00	0	0.199	33	0	0	0.256	39	0.456	71	0
2020-06-28 06:49:00	0	0.199	33	0	0	0.256	36	0.456	71	0
2020-06-28 06:49:00	0	0.199	33	0	0	0.255	36	0.456	71	0
2020-06-28 06:49:00	0	0.199	33	0	0	0.255	36	0.456	71	0
2020-06-28 06:49:00	0	0.199	34	0	0	0.255	37	0.456	71	0
2020-06-28 06:49:00	0	0.199	33	0	0	0.261	38	0.456	71	0
2020-06-28 06:49:00	0	0.199	33	0	0	0.261	43	0.456	71	0
2020-06-28 06:49:00	0	0.198	33	0	0	0.261	53	0.458	71	0
2020-06-28 06:49:00	0	0.198	34	0	0	0.314	53	0.458	71	0
2020-06-28 06:49:00	0	0.2	34	0	0	0.314	52	0.458	71	0
2020-06-28 06:49:00	0	0.2	33	0	0	0.315	54	0.458	71	0
2020-06-28 06:49:00	0	0.199	34	0	0	0.315	55	0.458	71	0
2020-06-28 06:49:00	0	0.199	33	0	0	0.32	54	0.456	71	0
2020-06-28 06:49:00	0	0.197	33	0	0	0.32	53	0.456	71	0
2020-06-28 06:49:00	0	0.197	33	0	0	0.32	53	0.459	72	0
2020-06-28 06:49:00	0	0.2	33	0	0	0.315	53	0.459	71	0
2020-06-28 06:49:00	0	0.2	34	0	0	0.315	53	0.459	71	0
2020-06-28 06:49:00	0	0.198	33	0	0	0.315	53	0.458	71	0
2020-06-28 06:49:00	0	0.198	33	0	0	0.315	53	0.458	71	0
2020-06-28 06:49:00	0	0.199	33	0	0	0.315	54	0.457	71	0
2020-06-28 06:49:00	0	0.199	33	0	0	0.316	53	0.457	71	0
2020-06-28 06:49:00	0	0.199	33	0	0	0.316	54	0.456	71	0
2020-06-28 06:49:00	0	0.199	33	0	0	0.316	38	0.456	71	0
2020-06-28 06:49:00	0	0.198	33	0	0	0.256	36	0.456	72	0
2020-06-28 06:49:00	0	0.198	33	0	0	0.256	37	0.456	70	0
2020-06-28 06:49:00	0	0.198	33	0	0	0.256	37	0.456	71	0
2020-06-28 06:49:00	0	0.198	33	0	0	0.255	36	0.461	72	0
2020-06-28 06:49:00	0	0.197	34	0	0	0.255	37	0.461	73	0
2020-06-28 06:49:00	0	0.197	33	0	0	0.255	37	0.516	76	0
2020-06-28 06:49:00	0	0.199	33	0	0	0.256	37	0.516	87	0
2020-06-28 06:49:00	0	0.199	34	0	0	0.256	36	0.516	87	0
2020-06-28 06:49:00	0	0.2	34	0	0	0.256	36	0.521	87	0
2020-06-28 06:49:00	0	0.2	34	0	0	0.254	36	0.521	87	0
2020-06-28 06:49:00	0	0.199	33	0	0	0.254	36	0.519	87	0
2020-06-28 06:49:00	0	0.199	33	0	0	0.254	36	0.519	88	0
2020-06-28 06:49:00	0	0.198	34	0	0	0.254	36	0.52	88	0
2020-06-28 06:49:00	0	0.198	34	0	0	0.254	36	0.52	87	0
2020-06-28 06:49:00	0	0.199	33	0	0	0.254	36	0.518	87	0
2020-06-28 06:49:00	0	0.199	34	0	0	0.254	37	0.518	87	0
2020-06-28 06:49:00	0	0.2	34	0	0	0.254	37	0.518	87	0
2020-06-28 06:49:00	0	0.2	34	0	0	0.256	37	0.518	87	0
2020-06-28 06:49:00	0	0.199	33	0	0	0.256	37	0.518	88	0
2020-06-28 06:49:00	0	0.199	33	0	0	0.256	36	0.519	87	0
2020-06-28 06:49:00	0	0.199	34	0	0	0.258	37	0.519	87	0
2020-06-28 06:49:00	0	0.199	33	0	0	0.258	38	0.474	87	0
2020-06-28 06:49:00	0	0.198	34	0	0	0.258	36	0.474	71	0
2020-06-28 06:49:00	0	0.198	33	0	0	0.254	36	0.474	71	0
2020-06-28 06:49:00	0	0.199	33	0	0	0.254	36	0.458	71	0
2020-06-28 06:49:00	0	0.199	34	0	0	0.254	36	0.458	71	0
2020-06-28 06:49:00	0	0.199	33	0	0	0.255	37	0.458	71	0
2020-06-28 06:49:00	0	0.197	33	0	0	0.255	37	0.458	71	0
2020-06-28 06:49:00	0	0.197	33	0	0	0.255	36	0.458	70	0
2020-06-28 06:49:00	0	0.198	33	0	0	0.256	37	0.458	70	0
2020-06-28 06:49:00	0	0.198	33	0	0	0.256	36	0.458	70	0
2020-06-28 06:49:00	0	0.198	33	0	0	0.256	36	0.455	70	0
2020-06-28 06:50:00	0	0.198	33	0	0	0.254	36	0.455	70	0
2020-06-28 06:50:00	0	0.198	33	0	0	0.254	36	0.455	70	0
2020-06-28 06:50:00	0	0.198	33	0	0	0.254	36	0.455	70	0
2020-06-28 06:50:00	0	0.206	34	0	0	0.256	37	0.455	70	0
2020-06-28 06:50:00	0	0.206	34	0	0	0.256	37	0.455	70	0
2020-06-28 06:50:00	0	0.202	35	0	0	0.256	37	0.458	71	0
2020-06-28 06:50:00	0	0.202	34	0	0	0.256	37	0.458	71	0
2020-06-28 06:50:00	0	0.203	34	0	0	0.256	37	0.458	71	0
2020-06-28 06:50:00	0	0.203	34	0	0	0.255	37	0.457	71	0
2020-06-28 06:50:00	0	0.203	35	0	0	0.255	37	0.457	71	0
2020-06-28 06:50:00	0	0.203	33	0	0	0.255	38	0.461	72	0
2020-06-28 06:50:00	0	0.198	33	0	0	0.315	53	0.461	70	0
2020-06-28 06:50:00	0	0.198	33	0	0	0.315	53	0.461	70	0
2020-06-28 06:50:00	0	0.199	33	0	0	0.315	53	0.455	70	0
2020-06-28 06:50:00	0	0.199	33	0	0	0.314	53	0.455	70	0
2020-06-28 06:50:00	0	0.197	33	0	0	0.314	53	0.456	71	0
2020-06-28 06:50:00	0	0.197	34	0	0	0.316	53	0.456	70	0
2020-06-28 06:50:00	0	0.198	33	0	0	0.316	53	0.456	70	0
2020-06-28 06:50:00	0	0.198	33	0	0	0.316	53	0.456	71	0
2020-06-28 06:50:00	0	0.199	33	0	0	0.314	53	0.456	71	0
2020-06-28 06:50:00	0	0.199	34	0	0	0.314	53	0.457	72	0
2020-06-28 06:50:00	0	0.199	34	0	0	0.314	53	0.457	70	0
2020-06-28 06:50:00	0	0.199	33	0	0	0.314	53	0.455	70	0
2020-06-28 06:50:00	0	0.198	34	0	0	0.314	53	0.455	71	0
2020-06-28 06:50:00	0	0.198	33	0	0	0.307	48	0.461	73	0
2020-06-28 06:50:00	0	0.198	33	0	0	0.307	53	0.461	73	0
2020-06-28 06:50:00	0	0.198	33	0	0	0.307	53	0.461	72	0
2020-06-28 06:50:00	0	0.199	33	0	0	0.282	38	0.462	72	0
2020-06-28 06:50:00	0	0.199	33	0	0	0.282	36	0.462	72	0
2020-06-28 06:50:00	0	0.197	33	0	0	0.282	36	0.463	72	0
2020-06-28 06:50:00	0	0.197	33	0	0	0.254	37	0.463	70	0
2020-06-28 06:50:00	0	0.2	33	0	0	0.254	37	0.457	71	0
2020-06-28 06:50:00	0	0.2	33	0	0	0.256	37	0.457	71	0
2020-06-28 06:50:00	0	0.198	34	0	0	0.256	37	0.518	87	0
2020-06-28 06:50:00	0	0.198	33	0	0	0.256	37	0.518	87	0
2020-06-28 06:50:00	0	0.197	33	0	0	0.303	64	0.518	87	0
2020-06-28 06:50:00	0	0.197	34	0	0	0.303	37	0.518	87	0
2020-06-28 06:50:00	0	0.198	33	0	0	0.303	37	0.518	87	0
2020-06-28 06:50:00	0	0.198	34	0	0	0.259	38	0.519	87	0
2020-06-28 06:50:00	0	0.2	33	0	0	0.259	38	0.519	87	0
2020-06-28 06:50:00	0	0.2	34	0	0	0.259	36	0.518	87	0
2020-06-28 06:50:00	0	0.198	33	0	0	0.255	36	0.518	87	0
2020-06-28 06:50:00	0	0.198	33	0	0	0.255	37	0.516	87	0
2020-06-28 06:50:00	0	0.2	33	0	0	0.255	37	0.516	87	0
2020-06-28 06:50:00	0	0.2	33	0	0	0.256	37	0.516	87	0
2020-06-28 06:50:00	0	0.199	33	0	0	0.256	37	0.516	88	0
2020-06-28 06:50:00	0	0.199	33	0	0	0.256	37	0.516	88	0
2020-06-28 06:50:00	0	0.199	33	0	0	0.256	37	0.519	85	0
2020-06-28 06:50:00	0	0.199	33	0	0	0.256	37	0.519	87	0
2020-06-28 06:50:00	0	0.199	34	0	0	0.256	37	0.463	74	0
2020-06-28 06:50:00	0	0.199	33	0	0	0.256	37	0.463	71	0
2020-06-28 06:50:00	0	0.199	33	0	0	0.256	37	0.463	70	0
2020-06-28 06:50:00	0	0.198	33	0	0	0.256	37	0.455	71	0
2020-06-28 06:50:00	0	0.198	33	0	0	0.256	38	0.455	71	0
2020-06-28 06:50:00	0	0.197	34	0	0	0.256	38	0.458	71	0
2020-06-28 06:50:00	0	0.197	33	0	0	0.261	38	0.458	71	0
2020-06-28 06:50:00	0	0.198	34	0	0	0.261	39	0.459	71	0
2020-06-28 06:50:00	0	0.198	34	0	0	0.261	37	0.459	90	0
2020-06-28 06:50:00	0	0.199	33	0	0	0.256	36	0.459	84	0
2020-06-28 06:50:00	0	0.199	33	0	0	0.256	36	0.459	71	0
2020-06-28 06:51:00	0	0.198	33	0	0	0.256	36	0.459	73	0
2020-06-28 06:51:00	0	0.198	34	0	0	0.254	36	0.464	72	0
2020-06-28 06:51:00	0	0.199	33	0	0	0.254	36	0.464	71	0
2020-06-28 06:51:00	0	0.199	33	0	0	0.254	37	0.456	70	0
2020-06-28 06:51:00	0	0.199	33	0	0	0.255	37	0.456	71	0
2020-06-28 06:51:00	0	0.199	33	0	0	0.255	37	0.456	71	0
2020-06-28 06:51:00	0	0.198	33	0	0	0.255	37	0.458	71	0
2020-06-28 06:51:00	0	0.198	33	0	0	0.255	37	0.458	71	0
2020-06-28 06:51:00	0	0.199	33	0	0	0.255	37	0.458	71	0
2020-06-28 06:51:00	0	0.199	33	0	0	0.262	37	0.458	71	0
2020-06-28 06:51:00	0	0.198	33	0	0	0.262	56	0.458	71	0
2020-06-28 06:51:00	0	0.198	33	0	0	0.262	53	0.458	71	0
2020-06-28 06:51:00	0	0.197	33	0	0	0.316	53	0.458	71	0
2020-06-28 06:51:00	0	0.197	33	0	0	0.316	53	0.458	71	0
2020-06-28 06:51:00	0	0.196	34	0	0	0.316	53	0.458	71	0
2020-06-28 06:51:00	0	0.196	34	0	0	0.315	53	0.457	72	0
2020-06-28 06:51:00	0	0.198	34	0	0	0.315	53	0.457	73	0
2020-06-28 06:51:00	0	0.198	33	0	0	0.314	53	0.463	73	0
2020-06-28 06:51:00	0	0.198	33	0	0	0.314	53	0.463	73	0
2020-06-28 06:51:00	0	0.198	33	0	0	0.314	53	0.463	71	0
2020-06-28 06:51:00	0	0.199	34	0	0	0.315	53	0.459	70	0
2020-06-28 06:51:00	0	0.199	34	0	0	0.315	53	0.459	70	0
2020-06-28 06:51:00	0	0.198	34	0	0	0.315	53	0.455	70	0
2020-06-28 06:51:00	0	0.198	33	0	0	0.317	53	0.455	70	0
2020-06-28 06:51:00	0	0.2	34	0	0	0.317	54	0.456	70	0
2020-06-28 06:51:00	0	0.2	33	0	0	0.312	52	0.456	71	0
2020-06-28 06:51:00	0	0.2	33	0	0	0.312	41	0.456	71	0
2020-06-28 06:51:00	0	0.199	33	0	0	0.312	37	0.456	71	0
2020-06-28 06:51:00	0	0.199	35	0	0	0.256	37	0.456	71	0
2020-06-28 06:51:00	0	0.202	33	0	0	0.256	37	0.457	71	0
2020-06-28 06:51:00	0	0.202	33	0	0	0.256	37	0.457	71	0
2020-06-28 06:51:00	0	0.196	33	0	0	0.256	37	0.457	71	0
2020-06-28 06:51:00	0	0.196	33	0	0	0.256	37	0.457	76	0
2020-06-28 06:51:00	0	0.199	33	0	0	0.256	36	0.516	88	0
2020-06-28 06:51:00	0	0.199	34	0	0	0.255	37	0.516	87	0
2020-06-28 06:51:00	0	0.198	33	0	0	0.255	37	0.516	87	0
2020-06-28 06:51:00	0	0.198	33	0	0	0.255	37	0.518	87	0
2020-06-28 06:51:00	0	0.199	33	0	0	0.256	37	0.518	87	0
2020-06-28 06:51:00	0	0.199	33	0	0	0.256	37	0.518	87	0
2020-06-28 06:51:00	0	0.199	34	0	0	0.256	37	0.518	87	0
2020-06-28 06:51:00	0	0.199	34	0	0	0.256	37	0.517	87	0
2020-06-28 06:51:00	0	0.199	34	0	0	0.256	37	0.517	87	0
2020-06-28 06:51:00	0	0.199	34	0	0	0.257	37	0.517	87	0
2020-06-28 06:51:00	0	0.198	33	0	0	0.257	37	0.516	87	0
2020-06-28 06:51:00	0	0.198	33	0	0	0.257	37	0.516	87	0
2020-06-28 06:51:00	0	0.198	33	0	0	0.257	37	0.52	88	0
2020-06-28 06:51:00	0	0.198	33	0	0	0.257	37	0.52	85	0
2020-06-28 06:51:00	0	0.198	33	0	0	0.257	38	0.519	85	0
2020-06-28 06:51:00	0	0.198	33	0	0	0.257	36	0.519	86	0
2020-06-28 06:51:00	0	0.198	33	0	0	0.257	36	0.459	71	0
2020-06-28 06:51:00	0	0.198	33	0	0	0.257	36	0.459	71	0
2020-06-28 06:51:00	0	0.198	33	0	0	0.254	37	0.459	71	0
2020-06-28 06:51:00	0	0.198	33	0	0	0.254	37	0.458	71	0
2020-06-28 06:51:00	0	0.198	33	0	0	0.254	37	0.458	71	0
2020-06-28 06:51:00	0	0.198	33	0	0	0.257	37	0.458	71	0
2020-06-28 06:51:00	0	0.199	34	0	0	0.257	38	0.457	71	0
2020-06-28 06:51:00	0	0.199	33	0	0	0.256	37	0.457	71	0
2020-06-28 06:51:00	0	0.198	34	0	0	0.256	37	0.457	71	0
2020-06-28 06:52:00	0	0.198	33	0	0	0.256	36	0.457	71	0
2020-06-28 06:52:00	0	0.2	33	0	0	0.257	37	0.457	71	0
2020-06-28 06:52:00	0	0.2	33	0	0	0.257	37	0.458	71	0
2020-06-28 06:52:00	0	0.2	33	0	0	0.257	37	0.458	71	0
2020-06-28 06:52:00	0	0.2	33	0	0	0.256	37	0.457	71	0
2020-06-28 06:52:00	0	0.197	34	0	0	0.256	37	0.457	71	0
2020-06-28 06:52:00	0	0.197	34	0	0	0.256	37	0.457	71	0
2020-06-28 06:52:00	0	0.198	33	0	0	0.255	36	0.458	71	0
2020-06-28 06:52:00	0	0.198	33	0	0	0.255	37	0.458	71	0
2020-06-28 06:52:00	0	0.199	33	0	0	0.255	36	0.458	71	0
2020-06-28 06:52:00	0	0.199	33	0	0	0.255	37	0.458	72	0
2020-06-28 06:52:00	0	0.198	33	0	0	0.255	53	0.457	70	0
2020-06-28 06:52:00	0	0.198	33	0	0	0.315	53	0.457	70	0
2020-06-28 06:52:00	0	0.199	33	0	0	0.315	53	0.457	70	0
2020-06-28 06:52:00	0	0.199	33	0	0	0.315	53	0.455	70	0
2020-06-28 06:52:00	0	0.197	33	0	0	0.314	53	0.455	71	0
2020-06-28 06:52:00	0	0.197	34	0	0	0.314	53	0.458	71	0
2020-06-28 06:52:00	0	0.197	33	0	0	0.314	55	0.458	71	0
2020-06-28 06:52:00	0	0.198	33	0	0	0.318	52	0.458	71	0
2020-06-28 06:52:00	0	0.198	33	0	0	0.318	52	0.458	72	0
2020-06-28 06:52:00	0	0.199	33	0	0	0.312	53	0.458	71	0
2020-06-28 06:52:00	0	0.199	33	0	0	0.312	53	0.457	70	0
2020-06-28 06:52:00	0	0.199	33	0	0	0.312	53	0.457	71	0
2020-06-28 06:52:00	0	0.199	33	0	0	0.314	53	0.458	71	0
2020-06-28 06:52:00	0	0.199	33	0	0	0.314	54	0.458	71	0
2020-06-28 06:52:00	0	0.199	33	0	0	0.314	53	0.459	71	0
2020-06-28 06:52:00	0	0.197	33	0	0	0.317	51	0.459	71	0
2020-06-28 06:52:00	0	0.197	33	0	0	0.317	49	0.459	71	0
2020-06-28 06:52:00	0	0.199	33	0	0	0.257	36	0.458	71	0
2020-06-28 06:52:00	0	0.199	33	0	0	0.257	36	0.458	71	0
2020-06-28 06:52:00	0	0.199	33	0	0	0.257	36	0.457	71	0
2020-06-28 06:52:00	0	0.199	34	0	0	0.256	37	0.457	71	0
2020-06-28 06:52:00	0	0.198	33	0	0	0.256	37	0.482	72	0
2020-06-28 06:52:00	0	0.198	34	0	0	0.256	37	0.482	87	0
2020-06-28 06:52:00	0	0.199	33	0	0	0.255	37	0.518	87	0
2020-06-28 06:52:00	0	0.199	33	0	0	0.255	37	0.518	87	0
2020-06-28 06:52:00	0	0.199	34	0	0	0.255	37	0.518	87	0
2020-06-28 06:52:00	0	0.199	33	0	0	0.257	37	0.517	87	0
2020-06-28 06:52:00	0	0.199	33	0	0	0.257	37	0.517	87	0
2020-06-28 06:52:00	0	0.199	33	0	0	0.257	37	0.521	88	0
2020-06-28 06:52:00	0	0.199	34	0	0	0.256	37	0.521	88	0
2020-06-28 06:52:00	0	0.199	34	0	0	0.256	37	0.515	86	0
2020-06-28 06:52:00	0	0.198	33	0	0	0.256	37	0.515	86	0
2020-06-28 06:52:00	0	0.198	33	0	0	0.257	37	0.515	87	0
2020-06-28 06:52:00	0	0.199	33	0	0	0.257	37	0.516	87	0
2020-06-28 06:52:00	0	0.199	34	0	0	0.257	37	0.516	88	0
2020-06-28 06:52:00	0	0.199	34	0	0	0.256	37	0.521	88	0
2020-06-28 06:52:00	0	0.199	33	0	0	0.256	37	0.521	87	0
2020-06-28 06:52:00	0	0.198	34	0	0	0.256	37	0.515	87	0
2020-06-28 06:52:00	0	0.198	33	0	0	0.256	37	0.515	76	0
2020-06-28 06:52:00	0	0.198	33	0	0	0.256	36	0.455	70	0
2020-06-28 06:52:00	0	0.199	34	0	0	0.256	36	0.455	70	0
2020-06-28 06:52:00	0	0.199	33	0	0	0.254	36	0.455	71	0
2020-06-28 06:52:00	0	0.197	33	0	0	0.254	37	0.458	71	0
2020-06-28 06:52:00	0	0.197	34	0	0	0.254	36	0.458	71	0
2020-06-28 06:52:00	0	0.199	33	0	0	0.254	36	0.457	70	0
2020-06-28 06:52:00	0	0.199	33	0	0	0.254	36	0.457	71	0
2020-06-28 06:52:00	0	0.197	33	0	0	0.257	37	0.458	71	0
2020-06-28 06:52:00	0	0.197	33	0	0	0.257	37	0.458	72	0
2020-06-28 06:52:00	0	0.199	33	0	0	0.257	42	0.458	71	0
2020-06-28 06:53:00	0	0.199	33	0	0	0.279	43	0.458	72	0
2020-06-28 06:53:00	0	0.2	33	0	0	0.279	36	0.458	71	0
2020-06-28 06:53:00	0	0.2	33	0	0	0.279	36	0.458	71	0
2020-06-28 06:53:00	0	0.204	34	0	0	0.256	37	0.458	71	0
2020-06-28 06:53:00	0	0.204	33	0	0	0.256	37	0.458	71	0
2020-06-28 06:53:00	0	0.198	33	0	0	0.257	38	0.458	71	0
2020-06-28 06:53:00	0	0.198	34	0	0	0.257	37	0.458	71	0
2020-06-28 06:53:00	0	0.199	33	0	0	0.257	37	0.458	71	0
2020-06-28 06:53:00	0	0.199	33	0	0	0.257	37	0.458	71	0
2020-06-28 06:53:00	0	0.198	33	0	0	0.257	54	0.459	71	0
2020-06-28 06:53:00	0	0.198	33	0	0	0.316	54	0.459	71	0
2020-06-28 06:53:00	0	0.197	33	0	0	0.316	53	0.455	70	0
2020-06-28 06:53:00	0	0.197	33	0	0	0.316	53	0.455	70	0
2020-06-28 06:53:00	0	0.199	33	0	0	0.313	59	0.455	70	0
2020-06-28 06:53:00	0	0.199	33	0	0	0.313	59	0.455	71	0
2020-06-28 06:53:00	0	0.198	33	0	0	0.328	59	0.455	70	0
2020-06-28 06:53:00	0	0.198	33	0	0	0.328	53	0.455	70	0
2020-06-28 06:53:00	0	0.198	33	0	0	0.328	53	0.455	70	0
2020-06-28 06:53:00	0	0.198	33	0	0	0.315	54	0.46	71	0
2020-06-28 06:53:00	0	0.199	34	0	0	0.315	53	0.46	71	0
2020-06-28 06:53:00	0	0.199	34	0	0	0.315	54	0.46	70	0
2020-06-28 06:53:00	0	0.198	33	0	0	0.318	53	0.455	70	0
2020-06-28 06:53:00	0	0.198	33	0	0	0.318	55	0.455	71	0
2020-06-28 06:53:00	0	0.198	33	0	0	0.308	50	0.456	70	0
2020-06-28 06:53:00	0	0.198	33	0	0	0.308	53	0.456	71	0
2020-06-28 06:53:00	0	0.2	33	0	0	0.308	53	0.458	71	0
2020-06-28 06:53:00	0	0.2	33	0	0	0.257	37	0.458	71	0
2020-06-28 06:53:00	0	0.198	33	0	0	0.257	38	0.458	70	0
2020-06-28 06:53:00	0	0.198	33	0	0	0.257	38	0.459	71	0
2020-06-28 06:53:00	0	0.199	33	0	0	0.256	36	0.459	71	0
2020-06-28 06:53:00	0	0.199	33	0	0	0.256	36	0.458	71	0
2020-06-28 06:53:00	0	0.2	34	0	0	0.256	37	0.458	72	0
2020-06-28 06:53:00	0	0.2	33	0	0	0.256	36	0.52	72	0
2020-06-28 06:53:00	0	0.197	33	0	0	0.256	36	0.52	87	0
2020-06-28 06:53:00	0	0.197	34	0	0	0.256	36	0.517	87	0
2020-06-28 06:53:00	0	0.199	33	0	0	0.254	36	0.517	87	0
2020-06-28 06:53:00	0	0.199	33	0	0	0.254	37	0.517	89	0
2020-06-28 06:53:00	0	0.198	33	0	0	0.254	37	0.516	89	0
2020-06-28 06:53:00	0	0.198	34	0	0	0.256	37	0.516	90	0
2020-06-28 06:53:00	0	0.199	33	0	0	0.256	37	0.524	90	0
2020-06-28 06:53:00	0	0.199	34	0	0	0.256	37	0.524	87	0
2020-06-28 06:53:00	0	0.199	34	0	0	0.257	37	0.52	87	0
2020-06-28 06:53:00	0	0.199	33	0	0	0.257	37	0.52	87	0
2020-06-28 06:53:00	0	0.2	33	0	0	0.257	37	0.52	88	0
2020-06-28 06:53:00	0	0.2	33	0	0	0.256	37	0.52	88	0
2020-06-28 06:53:00	0	0.199	34	0	0	0.256	37	0.52	88	0
2020-06-28 06:53:00	0	0.199	34	0	0	0.256	37	0.504	86	0
2020-06-28 06:53:00	0	0.199	33	0	0	0.256	37	0.504	87	0
2020-06-28 06:53:00	0	0.199	33	0	0	0.256	37	0.491	72	0
2020-06-28 06:53:00	0	0.198	33	0	0	0.257	37	0.46	71	0
2020-06-28 06:53:00	0	0.198	33	0	0	0.257	37	0.46	72	0
2020-06-28 06:53:00	0	0.199	33	0	0	0.257	37	0.46	70	0
2020-06-28 06:53:00	0	0.199	33	0	0	0.256	37	0.455	70	0
2020-06-28 06:53:00	0	0.2	33	0	0	0.256	37	0.455	72	0
2020-06-28 06:53:00	0	0.2	33	0	0	0.256	37	0.456	70	0
2020-06-28 06:53:00	0	0.2	33	0	0	0.258	38	0.456	70	0
2020-06-28 06:53:00	0	0.198	34	0	0	0.258	37	0.455	70	0
2020-06-28 06:53:00	0	0.198	33	0	0	0.258	37	0.455	70	0
2020-06-28 06:54:00	0	0.199	33	0	0	0.256	37	0.455	72	0
2020-06-28 06:54:00	0	0.199	33	0	0	0.256	37	0.459	71	0
2020-06-28 06:54:00	0	0.198	33	0	0	0.256	36	0.459	71	0
2020-06-28 06:54:00	0	0.198	33	0	0	0.255	36	0.459	71	0
2020-06-28 06:54:00	0	0.199	34	0	0	0.255	37	0.459	71	0
2020-06-28 06:54:00	0	0.199	33	0	0	0.255	37	0.458	71	0
2020-06-28 06:54:00	0	0.198	33	0	0	0.256	36	0.458	71	0
2020-06-28 06:54:00	0	0.198	34	0	0	0.256	36	0.458	71	0
2020-06-28 06:54:00	0	0.2	34	0	0	0.254	36	0.459	71	0
2020-06-28 06:54:00	0	0.2	34	0	0	0.254	37	0.459	71	0
2020-06-28 06:54:00	0	0.199	33	0	0	0.254	39	0.458	71	0
2020-06-28 06:54:00	0	0.199	33	0	0	0.317	53	0.458	72	0
2020-06-28 06:54:00	0	0.198	33	0	0	0.317	54	0.458	71	0
2020-06-28 06:54:00	0	0.198	33	0	0	0.317	53	0.458	71	0
2020-06-28 06:54:00	0	0.199	34	0	0	0.315	53	0.458	71	0
2020-06-28 06:54:00	0	0.199	33	0	0	0.315	53	0.459	71	0
2020-06-28 06:54:00	0	0.199	34	0	0	0.315	53	0.459	71	0
2020-06-28 06:54:00	0	0.199	33	0	0	0.315	53	0.458	71	0
2020-06-28 06:54:00	0	0.199	34	0	0	0.315	53	0.458	71	0
2020-06-28 06:54:00	0	0.199	33	0	0	0.315	53	0.459	72	0
2020-06-28 06:54:00	0	0.2	34	0	0	0.315	53	0.459	71	0
2020-06-28 06:54:00	0	0.2	33	0	0	0.315	53	0.459	71	0
2020-06-28 06:54:00	0	0.198	34	0	0	0.314	53	0.458	71	0
2020-06-28 06:54:00	0	0.198	33	0	0	0.314	53	0.458	70	0
2020-06-28 06:54:00	0	0.198	33	0	0	0.302	46	0.455	71	0
2020-06-28 06:54:00	0	0.198	34	0	0	0.302	54	0.455	71	0
2020-06-28 06:54:00	0	0.2	33	0	0	0.302	47	0.46	72	0
2020-06-28 06:54:00	0	0.2	34	0	0	0.28	38	0.46	70	0
2020-06-28 06:54:00	0	0.198	33	0	0	0.28	36	0.46	71	0
2020-06-28 06:54:00	0	0.198	34	0	0	0.28	37	0.457	71	0
2020-06-28 06:54:00	0	0.198	33	0	0	0.256	37	0.457	70	0
2020-06-28 06:54:00	0	0.197	33	0	0	0.256	37	0.456	71	0
2020-06-28 06:54:00	0	0.199	33	0	0	0.257	37	0.456	75	0
2020-06-28 06:54:00	0	0.199	33	0	0	0.257	37	0.518	87	0
2020-06-28 06:54:00	0	0.197	33	0	0	0.257	37	0.518	87	0
2020-06-28 06:54:00	0	0.197	33	0	0	0.256	37	0.518	87	0
2020-06-28 06:54:00	0	0.199	33	0	0	0.256	37	0.518	87	0
2020-06-28 06:54:00	0	0.199	33	0	0	0.256	37	0.518	87	0
2020-06-28 06:54:00	0	0.197	33	0	0	0.256	37	0.518	87	0
2020-06-28 06:54:00	0	0.197	33	0	0	0.256	58	0.518	87	0
2020-06-28 06:54:00	0	0.2	33	0	0	0.256	48	0.519	87	0
2020-06-28 06:54:00	0	0.2	33	0	0	0.286	42	0.519	87	0
2020-06-28 06:54:00	0	0.199	33	0	0	0.286	38	0.517	87	0
2020-06-28 06:54:00	0	0.199	33	0	0	0.286	37	0.517	87	0
2020-06-28 06:54:00	0	0.199	34	0	0	0.256	38	0.517	87	0
2020-06-28 06:54:00	0	0.199	34	0	0	0.256	37	0.516	88	0
2020-06-28 06:54:00	0	0.198	33	0	0	0.256	38	0.516	88	0
2020-06-28 06:54:00	0	0.198	33	0	0	0.256	37	0.518	84	0
2020-06-28 06:54:00	0	0.198	34	0	0	0.256	37	0.518	87	0
2020-06-28 06:54:00	0	0.198	33	0	0	0.256	37	0.461	75	0
2020-06-28 06:54:00	0	0.2	33	0	0	0.257	37	0.461	71	0
2020-06-28 06:54:00	0	0.2	33	0	0	0.257	37	0.461	71	0
2020-06-28 06:54:00	0	0.2	34	0	0	0.256	37	0.455	71	0
2020-06-28 06:54:00	0	0.198	33	0	0	0.256	37	0.455	71	0
2020-06-28 06:54:00	0	0.198	33	0	0	0.256	37	0.458	71	0
2020-06-28 06:54:00	0	0.198	33	0	0	0.256	37	0.458	72	0
2020-06-28 06:54:00	0	0.198	33	0	0	0.256	38	0.457	71	0
2020-06-28 06:54:00	0	0.197	33	0	0	0.256	37	0.457	71	0
2020-06-28 06:54:00	0	0.197	33	0	0	0.257	37	0.457	71	0
2020-06-28 06:54:00	0	0.199	33	0	0	0.257	37	0.458	71	0
2020-06-28 06:55:00	0	0.199	33	0	0	0.257	37	0.458	71	0
2020-06-28 06:55:00	0	0.199	33	0	0	0.256	37	0.459	72	0
2020-06-28 06:55:00	0	0.199	33	0	0	0.256	38	0.459	88	0
2020-06-28 06:55:00	0	0.198	33	0	0	0.256	38	0.477	88	0
2020-06-28 06:55:00	0	0.198	33	0	0	0.26	38	0.477	72	0
2020-06-28 06:55:00	0	0.2	33	0	0	0.26	37	0.477	71	0
2020-06-28 06:55:00	0	0.2	33	0	0	0.26	37	0.458	71	0
2020-06-28 06:55:00	0	0.199	33	0	0	0.254	36	0.458	72	0
2020-06-28 06:55:00	0	0.199	33	0	0	0.254	36	0.462	71	0
2020-06-28 06:55:00	0	0.199	33	0	0	0.254	40	0.462	71	0
2020-06-28 06:55:00	0	0.199	34	0	0	0.274	54	0.458	72	0
2020-06-28 06:55:00	0	0.198	33	0	0	0.274	53	0.458	71	0
2020-06-28 06:55:00	0	0.198	33	0	0	0.313	53	0.459	71	0
2020-06-28 06:55:00	0	0.199	34	0	0	0.313	53	0.459	71	0
2020-06-28 06:55:00	0	0.199	33	0	0	0.313	53	0.459	71	0
2020-06-28 06:55:00	0	0.199	33	0	0	0.314	53	0.458	72	0
2020-06-28 06:55:00	0	0.199	33	0	0	0.314	52	0.458	71	0
2020-06-28 06:55:00	0	0.199	33	0	0	0.314	53	0.457	71	0
2020-06-28 06:55:00	0	0.199	33	0	0	0.314	53	0.457	71	0
2020-06-28 06:55:00	0	0.2	33	0	0	0.314	52	0.458	71	0
2020-06-28 06:55:00	0	0.2	33	0	0	0.314	53	0.458	71	0
2020-06-28 06:55:00	0	0.199	34	0	0	0.314	53	0.458	71	0
2020-06-28 06:55:00	0	0.199	33	0	0	0.314	54	0.458	71	0
2020-06-28 06:55:00	0	0.198	34	0	0	0.318	48	0.458	70	0
2020-06-28 06:55:00	0	0.198	33	0	0	0.318	53	0.462	71	0
2020-06-28 06:55:00	0	0.199	33	0	0	0.313	51	0.462	73	0
2020-06-28 06:55:00	0	0.199	34	0	0	0.313	47	0.462	73	0
2020-06-28 06:55:00	0	0.198	33	0	0	0.313	38	0.462	71	0
2020-06-28 06:55:00	0	0.198	33	0	0	0.256	37	0.462	70	0
2020-06-28 06:55:00	0	0.198	33	0	0	0.256	36	0.456	70	0
2020-06-28 06:55:00	0	0.198	33	0	0	0.256	37	0.456	70	0
2020-06-28 06:55:00	0	0.198	33	0	0	0.257	37	0.456	70	0
2020-06-28 06:55:00	0	0.198	34	0	0	0.257	37	0.456	82	0
2020-06-28 06:55:00	0	0.198	33	0	0	0.257	37	0.515	87	0
2020-06-28 06:55:00	0	0.198	33	0	0	0.255	36	0.515	87	0
2020-06-28 06:55:00	0	0.198	33	0	0	0.255	37	0.515	87	0
2020-06-28 06:55:00	0	0.199	33	0	0	0.255	37	0.516	87	0
2020-06-28 06:55:00	0	0.199	33	0	0	0.257	37	0.516	87	0
2020-06-28 06:55:00	0	0.199	33	0	0	0.257	37	0.521	87	0
2020-06-28 06:55:00	0	0.199	33	0	0	0.257	37	0.521	86	0
2020-06-28 06:55:00	0	0.198	33	0	0	0.259	37	0.516	87	0
2020-06-28 06:55:00	0	0.198	33	0	0	0.259	37	0.516	87	0
2020-06-28 06:55:00	0	0.198	33	0	0	0.257	37	0.517	87	0
2020-06-28 06:55:00	0	0.198	33	0	0	0.257	37	0.517	87	0
2020-06-28 06:55:00	0	0.2	33	0	0	0.257	37	0.519	88	0
2020-06-28 06:55:00	0	0.2	34	0	0	0.257	37	0.519	85	0
2020-06-28 06:55:00	0	0.198	33	0	0	0.257	37	0.519	85	0
2020-06-28 06:55:00	0	0.198	33	0	0	0.257	37	0.519	86	0
2020-06-28 06:55:00	0	0.199	33	0	0	0.256	37	0.46	74	0
2020-06-28 06:55:00	0	0.199	34	0	0	0.256	37	0.46	71	0
2020-06-28 06:55:00	0	0.199	34	0	0	0.256	37	0.46	71	0
2020-06-28 06:55:00	0	0.199	33	0	0	0.255	37	0.456	71	0
2020-06-28 06:55:00	0	0.198	33	0	0	0.255	37	0.456	71	0
2020-06-28 06:55:00	0	0.198	33	0	0	0.255	37	0.457	71	0
2020-06-28 06:55:00	0	0.196	33	0	0	0.257	37	0.457	71	0
2020-06-28 06:55:00	0	0.196	33	0	0	0.257	37	0.455	71	0
2020-06-28 06:55:00	0	0.199	34	0	0	0.257	37	0.455	71	0
2020-06-28 06:55:00	0	0.199	33	0	0	0.255	36	0.455	71	0
2020-06-28 06:56:00	0	0.199	33	0	0	0.255	37	0.458	71	0
2020-06-28 06:56:00	0	0.199	33	0	0	0.255	37	0.458	71	0
2020-06-28 06:56:00	0	0.198	33	0	0	0.255	36	0.459	72	0
2020-06-28 06:56:00	0	0.198	33	0	0	0.255	37	0.459	71	0
2020-06-28 06:56:00	0	0.2	34	0	0	0.259	37	0.457	71	0
2020-06-28 06:56:00	0	0.2	34	0	0	0.259	36	0.457	71	0
2020-06-28 06:56:00	0	0.198	33	0	0	0.259	36	0.457	71	0
2020-06-28 06:56:00	0	0.198	34	0	0	0.255	36	0.457	71	0
2020-06-28 06:56:00	0	0.198	33	0	0	0.255	37	0.457	72	0
2020-06-28 06:56:00	0	0.198	33	0	0	0.255	37	0.461	71	0
2020-06-28 06:56:00	0	0.199	33	0	0	0.257	37	0.461	71	0
2020-06-28 06:56:00	0	0.199	34	0	0	0.257	55	0.459	71	0
2020-06-28 06:56:00	0	0.198	33	0	0	0.257	53	0.459	71	0
2020-06-28 06:56:00	0	0.198	33	0	0	0.315	53	0.459	72	0
2020-06-28 06:56:00	0	0.199	33	0	0	0.315	53	0.458	71	0
2020-06-28 06:56:00	0	0.199	34	0	0	0.313	53	0.458	71	0
2020-06-28 06:56:00	0	0.199	33	0	0	0.313	53	0.458	71	0
2020-06-28 06:56:00	0	0.199	33	0	0	0.313	53	0.458	71	0
2020-06-28 06:56:00	0	0.199	33	0	0	0.314	53	0.457	71	0
2020-06-28 06:56:00	0	0.199	33	0	0	0.314	53	0.457	71	0
2020-06-28 06:56:00	0	0.199	33	0	0	0.314	53	0.457	71	0
2020-06-28 06:56:00	0	0.199	33	0	0	0.315	53	0.456	71	0
2020-06-28 06:56:00	0	0.201	33	0	0	0.315	53	0.456	71	0
2020-06-28 06:56:00	0	0.201	33	0	0	0.314	53	0.458	71	0
2020-06-28 06:56:00	0	0.199	34	0	0	0.314	53	0.458	71	0
2020-06-28 06:56:00	0	0.199	33	0	0	0.314	53	0.464	73	0
2020-06-28 06:56:00	0	0.197	33	0	0	0.314	53	0.464	70	0
2020-06-28 06:56:00	0	0.197	33	0	0	0.314	41	0.464	70	0
2020-06-28 06:56:00	0	0.198	33	0	0	0.314	37	0.455	70	0
2020-06-28 06:56:00	0	0.198	33	0	0	0.256	37	0.455	71	0
2020-06-28 06:56:00	0	0.199	33	0	0	0.256	37	0.458	71	0
2020-06-28 06:56:00	0	0.199	33	0	0	0.256	37	0.458	71	0
2020-06-28 06:56:00	0	0.198	34	0	0	0.256	37	0.501	76	0
2020-06-28 06:56:00	0	0.198	33	0	0	0.256	37	0.501	88	0
2020-06-28 06:56:00	0	0.198	34	0	0	0.256	37	0.501	87	0
2020-06-28 06:56:00	0	0.198	34	0	0	0.257	37	0.517	87	0
2020-06-28 06:56:00	0	0.198	33	0	0	0.257	37	0.517	87	0
2020-06-28 06:56:00	0	0.198	33	0	0	0.257	37	0.517	87	0
2020-06-28 06:56:00	0	0.198	33	0	0	0.256	37	0.517	87	0
2020-06-28 06:56:00	0	0.2	33	0	0	0.256	37	0.516	87	0
2020-06-28 06:56:00	0	0.2	33	0	0	0.256	37	0.516	87	0
2020-06-28 06:56:00	0	0.198	33	0	0	0.256	38	0.517	87	0
2020-06-28 06:56:00	0	0.198	34	0	0	0.256	37	0.517	87	0
2020-06-28 06:56:00	0	0.198	33	0	0	0.256	37	0.517	87	0
2020-06-28 06:56:00	0	0.198	34	0	0	0.256	37	0.518	87	0
2020-06-28 06:56:00	0	0.199	33	0	0	0.256	38	0.518	88	0
2020-06-28 06:56:00	0	0.199	33	0	0	0.254	36	0.517	88	0
2020-06-28 06:56:00	0	0.201	34	0	0	0.254	37	0.517	85	0
2020-06-28 06:56:00	0	0.201	33	0	0	0.254	37	0.515	87	0
2020-06-28 06:56:00	0	0.2	33	0	0	0.257	37	0.515	76	0
2020-06-28 06:56:00	0	0.2	33	0	0	0.257	37	0.515	71	0
2020-06-28 06:56:00	0	0.198	33	0	0	0.257	37	0.458	71	0
2020-06-28 06:56:00	0	0.198	33	0	0	0.256	37	0.458	71	0
2020-06-28 06:56:00	0	0.199	33	0	0	0.256	36	0.458	71	0
2020-06-28 06:56:00	0	0.199	33	0	0	0.313	53	0.458	71	0
2020-06-28 06:56:00	0	0.2	33	0	0	0.315	53	0.458	71	0
2020-06-28 06:56:00	0	0.2	33	0	0	0.315	55	0.458	71	0
2020-06-28 06:56:00	0	0.199	33	0	0	0.308	53	0.458	72	0
2020-06-28 06:56:00	0	0.199	33	0	0	0.308	53	0.458	71	0
2020-06-28 06:56:00	0	0.197	34	0	0	0.308	53	0.458	71	0
2020-06-28 06:57:00	0	0.197	33	0	0	0.272	38	0.457	71	0
2020-06-28 06:57:00	0	0.199	33	0	0	0.272	37	0.457	71	0
2020-06-28 06:57:00	0	0.199	34	0	0	0.272	37	0.461	72	0
2020-06-28 06:57:00	0	0.197	34	0	0	0.256	37	0.461	71	0
2020-06-28 06:57:00	0	0.197	33	0	0	0.256	37	0.461	71	0
2020-06-28 06:57:00	0	0.198	33	0	0	0.256	37	0.458	72	0
2020-06-28 06:57:00	0	0.198	33	0	0	0.256	37	0.458	72	0
2020-06-28 06:57:00	0	0.198	34	0	0	0.256	37	0.457	71	0
2020-06-28 06:57:00	0	0.198	34	0	0	0.256	41	0.457	71	0
2020-06-28 06:57:00	0	0.2	34	0	0	0.269	36	0.458	71	0
2020-06-28 06:57:00	0	0.2	33	0	0	0.269	37	0.458	71	0
2020-06-28 06:57:00	0	0.198	33	0	0	0.269	37	0.458	71	0
2020-06-28 06:57:00	0	0.198	33	0	0	0.255	37	0.458	71	0
2020-06-28 06:57:00	0	0.199	33	0	0	0.255	37	0.458	71	0
2020-06-28 06:57:00	0	0.199	33	0	0	0.256	37	0.457	71	0
2020-06-28 06:57:00	0	0.2	33	0	0	0.256	37	0.457	71	0
2020-06-28 06:57:00	0	0.2	33	0	0	0.256	37	0.456	70	0
2020-06-28 06:57:00	0	0.199	34	0	0	0.257	37	0.456	71	0
2020-06-28 06:57:00	0	0.199	33	0	0	0.257	38	0.456	72	0
2020-06-28 06:57:00	0	0.2	33	0	0	0.257	36	0.46	71	0
2020-06-28 06:57:00	0	0.2	33	0	0	0.255	36	0.46	73	0
2020-06-28 06:57:00	0	0.2	33	0	0	0.255	36	0.463	73	0
2020-06-28 06:57:00	0	0.2	33	0	0	0.255	37	0.463	71	0
2020-06-28 06:57:00	0	0.198	33	0	0	0.256	36	0.461	72	0
2020-06-28 06:57:00	0	0.198	34	0	0	0.256	36	0.461	71	0
2020-06-28 06:57:00	0	0.199	33	0	0	0.256	36	0.461	71	0
2020-06-28 06:57:00	0	0.199	34	0	0	0.254	36	0.459	71	0
2020-06-28 06:57:00	0	0.198	33	0	0	0.254	37	0.459	71	0
2020-06-28 06:57:00	0	0.198	34	0	0	0.254	37	0.458	71	0
2020-06-28 06:57:00	0	0.199	33	0	0	0.255	37	0.458	71	0
2020-06-28 06:57:00	0	0.199	34	0	0	0.255	38	0.456	71	0
2020-06-28 06:57:00	0	0.198	34	0	0	0.255	37	0.456	73	0
2020-06-28 06:57:00	0	0.198	33	0	0	0.256	37	0.522	73	0
2020-06-28 06:57:00	0	0.199	33	0	0	0.256	37	0.522	87	0
2020-06-28 06:57:00	0	0.199	34	0	0	0.256	37	0.522	87	0
2020-06-28 06:57:00	0	0.197	33	0	0	0.256	37	0.519	87	0
2020-06-28 06:57:00	0	0.197	33	0	0	0.256	37	0.519	87	0
2020-06-28 06:57:00	0	0.199	33	0	0	0.263	40	0.516	87	0
2020-06-28 06:58:00	0	0.199	33	0	0	0.263	36	0.515	86	0
2020-06-28 06:58:00	0	0.197	33	0	0	0.263	37	0.517	87	0
2020-06-28 06:58:00	0	0.197	33	0	0	0.255	37	0.517	87	0
2020-06-28 06:58:00	0	0.199	33	0	0	0.255	36	0.519	88	0
2020-06-28 06:58:00	0	0.199	33	0	0	0.255	37	0.519	88	0
2020-06-28 06:58:00	0	0.2	34	0	0	0.302	53	0.52	85	0
2020-06-28 06:58:00	0	0.2	33	0	0	0.302	53	0.52	87	0
2020-06-28 06:58:00	0	0.199	33	0	0	0.315	53	0.461	78	0
2020-06-28 06:58:00	0	0.199	33	0	0	0.315	53	0.461	71	0
2020-06-28 06:58:00	0	0.199	33	0	0	0.315	53	0.461	71	0
2020-06-28 06:58:00	0	0.199	33	0	0	0.315	54	0.458	71	0
2020-06-28 06:58:00	0	0.199	33	0	0	0.315	53	0.458	71	0
2020-06-28 06:58:00	0	0.199	33	0	0	0.315	52	0.458	71	0
2020-06-28 06:58:00	0	0.199	33	0	0	0.314	53	0.458	71	0
2020-06-28 06:58:00	0	0.199	33	0	0	0.314	53	0.457	71	0
2020-06-28 06:58:00	0	0.199	33	0	0	0.315	53	0.457	71	0
2020-06-28 06:58:00	0	0.199	34	0	0	0.315	53	0.457	73	0
2020-06-28 06:58:00	0	0.199	33	0	0	0.315	53	0.456	71	0
2020-06-28 06:59:00	0	0.198	33	0	0	0.319	49	0.456	71	0
2020-06-28 06:59:00	0	0.198	34	0	0	0.319	54	0.458	72	0
2020-06-28 06:59:00	0	0.199	34	0	0	0.319	53	0.458	72	0
2020-06-28 06:59:00	0	0.199	34	0	0	0.311	38	0.458	71	0
2020-06-28 06:59:00	0	0.198	34	0	0	0.311	37	0.458	71	0
2020-06-28 06:59:00	0	0.198	33	0	0	0.311	36	0.458	71	0
2020-06-28 06:59:00	0	0.198	33	0	0	0.254	36	0.457	71	0
2020-06-28 06:59:00	0	0.198	33	0	0	0.254	37	0.457	72	0
2020-06-28 06:59:00	0	0.198	33	0	0	0.254	37	0.46	71	0
2020-06-28 06:59:00	0	0.198	33	0	0	0.255	37	0.46	70	0
2020-06-28 06:59:00	0	0.198	33	0	0	0.255	37	0.456	71	0
2020-06-28 06:59:00	0	0.198	35	0	0	0.255	37	0.456	71	0
2020-06-28 06:59:00	0	0.203	34	0	0	0.257	37	0.456	71	0
2020-06-28 06:59:00	0	0.203	33	0	0	0.257	37	0.457	71	0
2020-06-28 06:59:00	0	0.199	33	0	0	0.257	37	0.457	70	0
2020-06-28 06:59:00	0	0.199	33	0	0	0.257	37	0.455	71	0
2020-06-28 06:59:00	0	0.199	33	0	0	0.257	37	0.455	71	0
2020-06-28 06:59:00	0	0.199	33	0	0	0.257	37	0.457	71	0
2020-06-28 06:59:00	0	0.197	33	0	0	0.257	37	0.457	72	0
2020-06-28 06:59:00	0	0.197	34	0	0	0.257	37	0.457	71	0
2020-06-28 06:59:00	0	0.199	33	0	0	0.257	37	0.457	71	0
2020-06-28 06:59:00	0	0.199	34	0	0	0.257	37	0.457	71	0
2020-06-28 06:59:00	0	0.198	33	0	0	0.256	37	0.458	73	0
2020-06-28 06:59:00	0	0.198	34	0	0	0.256	37	0.458	71	0
2020-06-28 06:59:00	0	0.199	34	0	0	0.256	37	0.459	71	0
2020-06-28 06:59:00	0	0.199	33	0	0	0.255	37	0.459	71	0
2020-06-28 06:59:00	0	0.199	33	0	0	0.255	37	0.459	77	0
2020-06-28 06:59:00	0	0.199	33	0	0	0.255	36	0.458	71	0
2020-06-28 06:59:00	0	0.199	33	0	0	0.254	36	0.458	71	0
2020-06-28 06:59:00	0	0.199	33	0	0	0.254	36	0.457	71	0
2020-06-28 06:59:00	0	0.199	33	0	0	0.254	37	0.462	71	0
2020-06-28 06:59:00	0	0.199	33	0	0	0.257	37	0.462	71	0
2020-06-28 06:59:00	0	0.199	34	0	0	0.257	38	0.462	87	0
2020-06-28 06:59:00	0	0.198	34	0	0	0.257	37	0.518	87	0
2020-06-28 06:59:00	0	0.198	34	0	0	0.256	37	0.518	87	0
2020-06-28 06:59:00	0	0.199	34	0	0	0.256	37	0.516	87	0
2020-06-28 06:59:00	0	0.199	34	0	0	0.256	37	0.516	87	0
2020-06-28 06:59:00	0	0.199	33	0	0	0.256	37	0.522	87	0
2020-06-28 06:59:00	0	0.2	33	0	0	0.256	37	0.522	88	0
2020-06-28 06:59:00	0	0.2	33	0	0	0.256	37	0.518	87	0
2020-06-28 06:59:00	0	0.198	33	0	0	0.257	37	0.518	87	0
2020-06-28 06:59:00	0	0.198	33	0	0	0.257	37	0.518	87	0
2020-06-28 06:59:00	0	0.198	33	0	0	0.256	37	0.518	87	0
2020-06-28 06:59:00	0	0.198	34	0	0	0.256	37	0.518	87	0
2020-06-28 06:59:00	0	0.198	33	0	0	0.256	37	0.524	88	0
2020-06-28 06:59:00	0	0.199	34	0	0	0.258	38	0.524	84	0
2020-06-28 06:59:00	0	0.199	33	0	0	0.258	54	0.521	88	0
2020-06-28 06:59:00	0	0.199	34	0	0	0.258	53	0.521	88	0
2020-06-28 06:59:00	0	0.199	34	0	0	0.314	53	0.521	71	0
2020-06-28 06:59:00	0	0.199	33	0	0	0.314	53	0.457	70	0
2020-06-28 06:59:00	0	0.199	34	0	0	0.314	53	0.457	72	0
2020-06-28 06:59:00	0	0.199	33	0	0	0.315	53	0.461	71	0
2020-06-28 06:59:00	0	0.199	33	0	0	0.315	53	0.461	71	0
2020-06-28 06:59:00	0	0.2	34	0	0	0.315	53	0.457	71	0
2020-06-28 06:59:00	0	0.2	33	0	0	0.315	53	0.457	71	0
2020-06-28 06:59:00	0	0.199	33	0	0	0.315	53	0.459	71	0
2020-06-28 06:59:00	0	0.199	33	0	0	0.315	53	0.459	71	0
2020-06-28 06:59:00	0	0.199	33	0	0	0.315	53	0.459	71	0
2020-06-28 07:00:00	0	0.199	34	0	0	0.315	53	0.458	71	0
2020-06-28 07:00:00	0	0.199	33	0	0	0.315	53	0.458	71	0
2020-06-28 07:00:00	0	0.199	33	0	0	0.315	53	0.458	71	0
2020-06-28 07:00:00	0	0.201	33	0	0	0.318	52	0.458	71	0
2020-06-28 07:00:00	0	0.201	33	0	0	0.318	38	0.458	71	0
2020-06-28 07:00:00	0	0.2	34	0	0	0.318	37	0.458	71	0
2020-06-28 07:00:00	0	0.2	33	0	0	0.255	36	0.458	71	0
2020-06-28 07:00:00	0	0.199	34	0	0	0.255	36	0.459	71	0
2020-06-28 07:00:00	0	0.199	33	0	0	0.255	37	0.459	71	0
2020-06-28 07:00:00	0	0.199	33	0	0	0.255	37	0.458	71	0
2020-06-28 07:00:00	0	0.199	33	0	0	0.255	36	0.458	71	0
2020-06-28 07:00:00	0	0.199	33	0	0	0.255	36	0.457	71	0
2020-06-28 07:00:00	0	0.199	33	0	0	0.255	37	0.457	71	0
2020-06-28 07:00:00	0	0.2	33	0	0	0.255	37	0.457	71	0
2020-06-28 07:00:00	0	0.2	33	0	0	0.255	37	0.455	71	0
2020-06-28 07:00:00	0	0.199	33	0	0	0.257	37	0.455	71	0
2020-06-28 07:00:00	0	0.199	33	0	0	0.257	37	0.458	71	0
2020-06-28 07:00:00	0	0.197	33	0	0	0.256	37	0.458	71	0
2020-06-28 07:00:00	0	0.197	33	0	0	0.256	37	0.458	71	0
2020-06-28 07:00:00	0	0.199	34	0	0	0.256	37	0.458	71	0
2020-06-28 07:00:00	0	0.199	34	0	0	0.255	36	0.458	71	0
2020-06-28 07:00:00	0	0.2	34	0	0	0.255	36	0.458	71	0
2020-06-28 07:00:00	0	0.2	33	0	0	0.255	37	0.458	71	0
2020-06-28 07:00:00	0	0.198	33	0	0	0.255	37	0.459	71	0
2020-06-28 07:00:00	0	0.198	33	0	0	0.255	37	0.459	71	0
2020-06-28 07:00:00	0	0.199	34	0	0	0.255	37	0.46	71	0
2020-06-28 07:00:00	0	0.199	33	0	0	0.257	37	0.46	71	0
2020-06-28 07:00:00	0	0.199	34	0	0	0.257	37	0.46	71	0
2020-06-28 07:00:00	0	0.197	33	0	0	0.257	37	0.459	71	0
2020-06-28 07:00:00	0	0.197	33	0	0	0.256	37	0.459	71	0
2020-06-28 07:00:00	0	0.2	33	0	0	0.256	37	0.459	71	0
2020-06-28 07:00:00	0	0.2	33	0	0	0.256	37	0.459	71	0
2020-06-28 07:00:00	0	0.198	34	0	0	0.256	37	0.5	73	0
2020-06-28 07:00:00	0	0.198	33	0	0	0.256	37	0.5	87	0
2020-06-28 07:00:00	0	0.2	33	0	0	0.257	37	0.5	87	0
2020-06-28 07:00:00	0	0.2	33	0	0	0.257	37	0.517	87	0
2020-06-28 07:00:00	0	0.2	33	0	0	0.257	37	0.517	89	0
2020-06-28 07:00:00	0	0.2	34	0	0	0.257	37	0.519	89	0
2020-06-28 07:00:00	0	0.199	33	0	0	0.257	37	0.519	87	0
2020-06-28 07:00:00	0	0.199	33	0	0	0.257	37	0.519	87	0
2020-06-28 07:00:00	0	0.199	34	0	0	0.255	37	0.519	87	0
2020-06-28 07:00:00	0	0.199	33	0	0	0.255	37	0.517	87	0
2020-06-28 07:00:00	0	0.2	33	0	0	0.255	37	0.517	87	0
2020-06-28 07:00:00	0	0.2	34	0	0	0.255	37	0.517	87	0
2020-06-28 07:00:00	0	0.199	33	0	0	0.255	37	0.518	87	0
2020-06-28 07:00:00	0	0.199	33	0	0	0.255	37	0.518	87	0
2020-06-28 07:00:00	0	0.198	33	0	0	0.256	37	0.517	87	0
2020-06-28 07:00:00	0	0.198	34	0	0	0.256	54	0.517	87	0
2020-06-28 07:00:00	0	0.199	34	0	0	0.317	54	0.512	88	0
2020-06-28 07:00:00	0	0.199	33	0	0	0.317	53	0.512	74	0
2020-06-28 07:00:00	0	0.199	33	0	0	0.317	53	0.512	70	0
2020-06-28 07:00:00	0	0.199	33	0	0	0.315	53	0.456	71	0
2020-06-28 07:00:00	0	0.199	33	0	0	0.315	53	0.456	70	0
2020-06-28 07:00:00	0	0.199	34	0	0	0.315	53	0.457	71	0
2020-06-28 07:00:00	0	0.199	33	0	0	0.315	53	0.457	70	0
2020-06-28 07:00:00	0	0.199	33	0	0	0.315	53	0.457	71	0
2020-06-28 07:00:00	0	0.198	34	0	0	0.316	53	0.457	71	0
2020-06-28 07:00:00	0	0.198	33	0	0	0.316	53	0.457	71	0
2020-06-28 07:00:00	0	0.198	33	0	0	0.316	53	0.459	71	0
2020-06-28 07:00:00	0	0.199	34	0	0	0.316	55	0.459	71	0
2020-06-28 07:01:00	0	0.199	34	0	0	0.316	53	0.459	72	0
2020-06-28 07:01:00	0	0.199	34	0	0	0.316	54	0.459	71	0
2020-06-28 07:01:00	0	0.2	33	0	0	0.317	53	0.458	71	0
2020-06-28 07:01:00	0	0.2	33	0	0	0.317	39	0.458	71	0
2020-06-28 07:01:00	0	0.198	34	0	0	0.259	39	0.458	71	0
2020-06-28 07:01:00	0	0.198	33	0	0	0.259	37	0.457	71	0
2020-06-28 07:01:00	0	0.2	33	0	0	0.259	37	0.457	71	0
2020-06-28 07:01:00	0	0.2	33	0	0	0.257	37	0.456	71	0
2020-06-28 07:01:00	0	0.199	34	0	0	0.257	37	0.456	71	0
2020-06-28 07:01:00	0	0.199	33	0	0	0.257	37	0.459	71	0
2020-06-28 07:01:00	0	0.197	34	0	0	0.257	37	0.459	71	0
2020-06-28 07:01:00	0	0.197	33	0	0	0.257	37	0.459	71	0
2020-06-28 07:01:00	0	0.2	33	0	0	0.257	37	0.458	71	0
2020-06-28 07:01:00	0	0.2	33	0	0	0.257	37	0.458	71	0
2020-06-28 07:01:00	0	0.2	33	0	0	0.257	37	0.458	71	0
2020-06-28 07:01:00	0	0.2	33	0	0	0.257	37	0.458	71	0
2020-06-28 07:01:00	0	0.199	34	0	0	0.257	37	0.458	71	0
2020-06-28 07:01:00	0	0.199	34	0	0	0.257	37	0.458	71	0
2020-06-28 07:01:00	0	0.199	34	0	0	0.257	37	0.459	71	0
2020-06-28 07:01:00	0	0.199	34	0	0	0.257	37	0.459	71	0
2020-06-28 07:01:00	0	0.199	34	0	0	0.257	37	0.459	71	0
2020-06-28 07:01:00	0	0.2	33	0	0	0.257	37	0.459	71	0
2020-06-28 07:01:00	0	0.2	34	0	0	0.255	37	0.459	71	0
2020-06-28 07:01:00	0	0.199	33	0	0	0.255	38	0.459	71	0
2020-06-28 07:01:00	0	0.199	33	0	0	0.255	37	0.457	70	0
2020-06-28 07:01:00	0	0.199	33	0	0	0.256	36	0.457	71	0
2020-06-28 07:01:00	0	0.199	34	0	0	0.256	36	0.457	71	0
2020-06-28 07:01:00	0	0.2	33	0	0	0.254	36	0.457	71	0
2020-06-28 07:01:00	0	0.2	34	0	0	0.254	36	0.457	71	0
2020-06-28 07:01:00	0	0.199	33	0	0	0.254	37	0.459	71	0
2020-06-28 07:01:00	0	0.199	34	0	0	0.255	37	0.459	71	0
2020-06-28 07:01:00	0	0.198	33	0	0	0.255	36	0.52	87	0
2020-06-28 07:01:00	0	0.198	33	0	0	0.255	37	0.52	87	0
2020-06-28 07:01:00	0	0.199	33	0	0	0.257	37	0.52	87	0
2020-06-28 07:01:00	0	0.199	33	0	0	0.257	37	0.519	87	0
2020-06-28 07:01:00	0	0.198	34	0	0	0.257	36	0.519	87	0
2020-06-28 07:01:00	0	0.198	33	0	0	0.254	36	0.519	87	0
2020-06-28 07:01:00	0	0.199	33	0	0	0.254	37	0.519	87	0
2020-06-28 07:01:00	0	0.199	33	0	0	0.254	37	0.519	87	0
2020-06-28 07:01:00	0	0.2	34	0	0	0.256	37	0.519	87	0
2020-06-28 07:01:00	0	0.2	34	0	0	0.256	37	0.519	87	0
2020-06-28 07:01:00	0	0.199	33	0	0	0.256	37	0.519	87	0
2020-06-28 07:01:00	0	0.199	33	0	0	0.257	37	0.519	87	0
2020-06-28 07:01:00	0	0.199	34	0	0	0.257	37	0.52	88	0
2020-06-28 07:01:00	0	0.199	33	0	0	0.257	37	0.52	86	0
2020-06-28 07:01:00	0	0.2	34	0	0	0.255	37	0.521	86	0
2020-06-28 07:01:00	0	0.2	33	0	0	0.255	53	0.521	88	0
2020-06-28 07:01:00	0	0.199	34	0	0	0.255	54	0.462	72	0
2020-06-28 07:01:00	0	0.199	33	0	0	0.316	53	0.462	71	0
2020-06-28 07:01:00	0	0.2	34	0	0	0.316	53	0.462	71	0
2020-06-28 07:01:00	0	0.2	33	0	0	0.315	54	0.457	71	0
2020-06-28 07:01:00	0	0.198	34	0	0	0.315	53	0.457	71	0
2020-06-28 07:01:00	0	0.198	33	0	0	0.316	54	0.461	71	0
2020-06-28 07:01:00	0	0.198	34	0	0	0.316	53	0.461	71	0
2020-06-28 07:01:00	0	0.198	33	0	0	0.316	53	0.459	71	0
2020-06-28 07:01:00	0	0.198	34	0	0	0.315	54	0.459	71	0
2020-06-28 07:01:00	0	0.199	33	0	0	0.315	53	0.459	71	0
2020-06-28 07:01:00	0	0.199	34	0	0	0.314	53	0.459	71	0
2020-06-28 07:02:00	0	0.198	34	0	0	0.314	54	0.459	71	0
2020-06-28 07:02:00	0	0.198	33	0	0	0.314	52	0.46	71	0
2020-06-28 07:02:00	0	0.198	33	0	0	0.306	54	0.46	71	0
2020-06-28 07:02:00	0	0.198	33	0	0	0.306	53	0.461	71	0
2020-06-28 07:02:00	0	0.2	33	0	0	0.306	37	0.461	71	0
2020-06-28 07:02:00	0	0.2	34	0	0	0.255	37	0.461	71	0
2020-06-28 07:02:00	0	0.199	34	0	0	0.255	36	0.459	71	0
2020-06-28 07:02:00	0	0.199	33	0	0	0.255	36	0.459	71	0
2020-06-28 07:02:00	0	0.199	33	0	0	0.254	37	0.456	71	0
2020-06-28 07:02:00	0	0.199	33	0	0	0.254	37	0.456	72	0
2020-06-28 07:02:00	0	0.199	33	0	0	0.254	38	0.457	71	0
2020-06-28 07:02:00	0	0.199	34	0	0	0.256	36	0.457	70	0
2020-06-28 07:02:00	0	0.199	33	0	0	0.256	36	0.457	71	0
2020-06-28 07:02:00	0	0.199	33	0	0	0.256	36	0.455	70	0
2020-06-28 07:02:00	0	0.199	33	0	0	0.254	37	0.455	71	0
2020-06-28 07:02:00	0	0.199	34	0	0	0.254	37	0.457	71	0
2020-06-28 07:02:00	0	0.199	33	0	0	0.254	37	0.457	71	0
2020-06-28 07:02:00	0	0.199	33	0	0	0.256	37	0.457	71	0
2020-06-28 07:02:00	0	0.198	33	0	0	0.256	37	0.457	71	0
2020-06-28 07:02:00	0	0.198	33	0	0	0.257	37	0.457	71	0
2020-06-28 07:02:00	0	0.198	34	0	0	0.257	37	0.459	71	0
2020-06-28 07:02:00	0	0.199	33	0	0	0.257	37	0.459	70	0
2020-06-28 07:02:00	0	0.199	33	0	0	0.257	37	0.456	71	0
2020-06-28 07:02:00	0	0.199	33	0	0	0.257	37	0.456	71	0
2020-06-28 07:02:00	0	0.199	33	0	0	0.257	37	0.457	71	0
2020-06-28 07:02:00	0	0.199	34	0	0	0.257	37	0.457	72	0
2020-06-28 07:02:00	0	0.199	34	0	0	0.257	37	0.457	71	0
2020-06-28 07:02:00	0	0.199	33	0	0	0.257	37	0.458	71	0
2020-06-28 07:02:00	0	0.199	34	0	0	0.257	37	0.458	71	0
2020-06-28 07:02:00	0	0.199	33	0	0	0.257	37	0.458	71	0
2020-06-28 07:02:00	0	0.199	33	0	0	0.257	37	0.458	71	0
2020-06-28 07:02:00	0	0.199	33	0	0	0.256	37	0.457	74	0
2020-06-28 07:02:00	0	0.198	33	0	0	0.256	37	0.457	74	0
2020-06-28 07:02:00	0	0.198	33	0	0	0.256	37	0.457	88	0
2020-06-28 07:02:00	0	0.199	34	0	0	0.258	37	0.517	87	0
2020-06-28 07:02:00	0	0.199	33	0	0	0.258	37	0.517	87	0
2020-06-28 07:02:00	0	0.198	33	0	0	0.258	37	0.518	87	0
2020-06-28 07:02:00	0	0.198	33	0	0	0.257	37	0.518	87	0
2020-06-28 07:02:00	0	0.199	33	0	0	0.257	37	0.519	87	0
2020-06-28 07:02:00	0	0.199	33	0	0	0.257	37	0.519	88	0
2020-06-28 07:02:00	0	0.199	33	0	0	0.256	37	0.519	87	0
2020-06-28 07:02:00	0	0.199	33	0	0	0.256	37	0.519	87	0
2020-06-28 07:02:00	0	0.198	34	0	0	0.257	37	0.519	87	0
2020-06-28 07:02:00	0	0.198	33	0	0	0.257	37	0.517	87	0
2020-06-28 07:02:00	0	0.199	33	0	0	0.257	37	0.517	87	0
2020-06-28 07:02:00	0	0.199	35	0	0	0.257	37	0.524	88	0
2020-06-28 07:02:00	0	0.203	34	0	0	0.257	37	0.524	85	0
2020-06-28 07:02:00	0	0.203	35	0	0	0.257	54	0.516	87	0
2020-06-28 07:02:00	0	0.203	35	0	0	0.318	53	0.516	87	0
2020-06-28 07:02:00	0	0.203	34	0	0	0.318	53	0.456	70	0
2020-06-28 07:02:00	0	0.198	33	0	0	0.315	53	0.456	70	0
2020-06-28 07:02:00	0	0.198	33	0	0	0.315	53	0.456	70	0
2020-06-28 07:02:00	0	0.198	33	0	0	0.315	53	0.456	70	0
2020-06-28 07:02:00	0	0.198	33	0	0	0.315	53	0.456	71	0
2020-06-28 07:02:00	0	0.198	34	0	0	0.315	53	0.461	71	0
2020-06-28 07:02:00	0	0.198	33	0	0	0.315	53	0.461	70	0
2020-06-28 07:02:00	0	0.198	34	0	0	0.314	53	0.455	70	0
2020-06-28 07:02:00	0	0.197	33	0	0	0.314	53	0.455	70	0
2020-06-28 07:02:00	0	0.197	33	0	0	0.314	53	0.455	71	0
2020-06-28 07:02:00	0	0.199	33	0	0	0.314	53	0.458	71	0
2020-06-28 07:03:00	0	0.199	33	0	0	0.314	56	0.458	72	0
2020-06-28 07:03:00	0	0.199	33	0	0	0.308	53	0.459	71	0
2020-06-28 07:03:00	0	0.199	33	0	0	0.308	53	0.459	71	0
2020-06-28 07:03:00	0	0.199	33	0	0	0.308	40	0.458	71	0
2020-06-28 07:03:00	0	0.199	33	0	0	0.257	37	0.458	71	0
2020-06-28 07:03:00	0	0.199	33	0	0	0.257	38	0.458	71	0
2020-06-28 07:03:00	0	0.199	34	0	0	0.257	37	0.459	72	0
2020-06-28 07:03:00	0	0.199	33	0	0	0.257	37	0.459	71	0
2020-06-28 07:03:00	0	0.199	33	0	0	0.257	37	0.458	71	0
2020-06-28 07:03:00	0	0.198	33	0	0	0.256	36	0.458	71	0
2020-06-28 07:03:00	0	0.198	33	0	0	0.256	36	0.459	71	0
2020-06-28 07:03:00	0	0.199	33	0	0	0.256	36	0.459	71	0
2020-06-28 07:03:00	0	0.199	33	0	0	0.254	36	0.459	71	0
2020-06-28 07:03:00	0	0.198	33	0	0	0.254	36	0.458	71	0
2020-06-28 07:03:00	0	0.198	34	0	0	0.254	36	0.458	71	0
2020-06-28 07:03:00	0	0.199	33	0	0	0.255	36	0.457	71	0
2020-06-28 07:03:00	0	0.199	33	0	0	0.255	36	0.457	71	0
2020-06-28 07:03:00	0	0.2	33	0	0	0.255	36	0.46	71	0
2020-06-28 07:03:00	0	0.2	33	0	0	0.254	36	0.46	71	0
2020-06-28 07:03:00	0	0.197	33	0	0	0.254	36	0.46	72	0
2020-06-28 07:03:00	0	0.197	33	0	0	0.254	37	0.464	72	0
2020-06-28 07:03:00	0	0.199	33	0	0	0.256	37	0.464	72	0
2020-06-28 07:03:00	0	0.199	33	0	0	0.256	37	0.462	73	0
2020-06-28 07:03:00	0	0.198	33	0	0	0.256	37	0.462	72	0
2020-06-28 07:03:00	0	0.198	33	0	0	0.255	37	0.458	71	0
2020-06-28 07:03:00	0	0.2	34	0	0	0.255	37	0.458	71	0
2020-06-28 07:03:00	0	0.2	33	0	0	0.255	37	0.458	71	0
2020-06-28 07:03:00	0	0.199	33	0	0	0.257	37	0.458	71	0
2020-06-28 07:03:00	0	0.199	33	0	0	0.257	37	0.458	72	0
2020-06-28 07:03:00	0	0.199	33	0	0	0.257	37	0.458	71	0
2020-06-28 07:03:00	0	0.199	33	0	0	0.257	37	0.458	71	0
2020-06-28 07:03:00	0	0.198	33	0	0	0.257	37	0.516	78	0
2020-06-28 07:03:00	0	0.198	33	0	0	0.258	38	0.516	88	0
2020-06-28 07:03:00	0	0.198	34	0	0	0.258	37	0.516	87	0
2020-06-28 07:03:00	0	0.199	34	0	0	0.258	37	0.519	87	0
2020-06-28 07:03:00	0	0.199	33	0	0	0.257	37	0.519	87	0
2020-06-28 07:03:00	0	0.198	33	0	0	0.257	37	0.518	87	0
2020-06-28 07:03:00	0	0.198	34	0	0	0.257	37	0.518	87	0
2020-06-28 07:03:00	0	0.198	33	0	0	0.257	37	0.518	87	0
2020-06-28 07:03:00	0	0.198	33	0	0	0.257	37	0.518	87	0
2020-06-28 07:03:00	0	0.199	33	0	0	0.257	37	0.516	87	0
2020-06-28 07:03:00	0	0.199	34	0	0	0.257	37	0.516	87	0
2020-06-28 07:03:00	0	0.199	34	0	0	0.257	37	0.516	87	0
2020-06-28 07:03:00	0	0.199	33	0	0	0.257	36	0.517	87	0
2020-06-28 07:03:00	0	0.199	33	0	0	0.254	36	0.517	89	0
2020-06-28 07:03:00	0	0.197	33	0	0	0.254	36	0.506	89	0
2020-06-28 07:03:00	0	0.197	33	0	0	0.298	46	0.506	85	0
2020-06-28 07:03:00	0	0.197	33	0	0	0.298	53	0.491	73	0
2020-06-28 07:03:00	0	0.198	33	0	0	0.298	53	0.491	71	0
2020-06-28 07:03:00	0	0.198	34	0	0	0.314	53	0.461	72	0
2020-06-28 07:03:00	0	0.199	33	0	0	0.314	53	0.461	71	0
2020-06-28 07:03:00	0	0.199	33	0	0	0.314	53	0.461	71	0
2020-06-28 07:03:00	0	0.199	33	0	0	0.317	53	0.458	71	0
2020-06-28 07:03:00	0	0.199	34	0	0	0.317	53	0.458	71	0
2020-06-28 07:03:00	0	0.199	34	0	0	0.315	53	0.455	70	0
2020-06-28 07:03:00	0	0.199	34	0	0	0.315	53	0.455	70	0
2020-06-28 07:03:00	0	0.199	34	0	0	0.315	53	0.455	71	0
2020-06-28 07:03:00	0	0.199	34	0	0	0.314	53	0.456	70	0
2020-06-28 07:03:00	0	0.198	33	0	0	0.314	53	0.456	70	0
2020-06-28 07:04:00	0	0.198	33	0	0	0.314	54	0.456	70	0
2020-06-28 07:04:00	0	0.2	34	0	0	0.318	48	0.456	71	0
2020-06-28 07:04:00	0	0.2	34	0	0	0.318	53	0.455	71	0
2020-06-28 07:04:00	0	0.199	34	0	0	0.312	52	0.455	71	0
2020-06-28 07:04:00	0	0.199	33	0	0	0.312	41	0.455	70	0
2020-06-28 07:04:00	0	0.199	33	0	0	0.312	36	0.456	71	0
2020-06-28 07:04:00	0	0.199	33	0	0	0.255	36	0.456	71	0
2020-06-28 07:04:00	0	0.199	33	0	0	0.255	36	0.458	71	0
2020-06-28 07:04:00	0	0.199	33	0	0	0.255	36	0.458	71	0
2020-06-28 07:04:00	0	0.199	34	0	0	0.256	37	0.457	71	0
2020-06-28 07:04:00	0	0.199	33	0	0	0.256	37	0.457	71	0
2020-06-28 07:04:00	0	0.2	33	0	0	0.256	37	0.457	71	0
2020-06-28 07:04:00	0	0.2	34	0	0	0.257	37	0.458	71	0
2020-06-28 07:04:00	0	0.199	34	0	0	0.257	37	0.458	71	0
2020-06-28 07:04:00	0	0.199	34	0	0	0.257	37	0.458	71	0
2020-06-28 07:04:00	0	0.199	34	0	0	0.257	37	0.458	71	0
2020-06-28 07:04:00	0	0.199	34	0	0	0.257	37	0.459	71	0
2020-06-28 07:04:00	0	0.199	34	0	0	0.257	37	0.459	71	0
2020-06-28 07:04:00	0	0.199	34	0	0	0.257	37	0.459	71	0
2020-06-28 07:04:00	0	0.198	33	0	0	0.257	37	0.459	71	0
2020-06-28 07:04:00	0	0.198	34	0	0	0.257	37	0.459	71	0
2020-06-28 07:04:00	0	0.198	33	0	0	0.257	37	0.457	71	0
2020-06-28 07:04:00	0	0.198	34	0	0	0.257	37	0.457	71	0
2020-06-28 07:04:00	0	0.198	33	0	0	0.257	37	0.458	71	0
2020-06-28 07:04:00	0	0.198	33	0	0	0.257	37	0.458	71	0
2020-06-28 07:04:00	0	0.2	34	0	0	0.257	37	0.458	72	0
2020-06-28 07:04:00	0	0.2	33	0	0	0.257	37	0.459	71	0
2020-06-28 07:04:00	0	0.199	33	0	0	0.257	37	0.459	71	0
2020-06-28 07:04:00	0	0.199	33	0	0	0.257	37	0.456	70	0
2020-06-28 07:04:00	0	0.2	33	0	0	0.258	37	0.456	70	0
2020-06-28 07:04:00	0	0.2	33	0	0	0.258	36	0.456	71	0
2020-06-28 07:04:00	0	0.198	33	0	0	0.258	36	0.456	70	0
2020-06-28 07:04:00	0	0.198	33	0	0	0.254	36	0.456	83	0
2020-06-28 07:04:00	0	0.199	33	0	0	0.254	37	0.518	88	0
2020-06-28 07:04:00	0	0.199	33	0	0	0.254	37	0.518	87	0
2020-06-28 07:04:00	0	0.199	33	0	0	0.255	37	0.517	87	0
2020-06-28 07:04:00	0	0.199	33	0	0	0.255	37	0.517	87	0
2020-06-28 07:04:00	0	0.199	34	0	0	0.255	37	0.52	87	0
2020-06-28 07:04:00	0	0.199	33	0	0	0.255	37	0.52	88	0
2020-06-28 07:04:00	0	0.199	33	0	0	0.255	37	0.518	87	0
2020-06-28 07:04:00	0	0.199	33	0	0	0.256	37	0.518	87	0
2020-06-28 07:04:00	0	0.199	34	0	0	0.256	37	0.518	87	0
2020-06-28 07:04:00	0	0.199	33	0	0	0.256	37	0.517	87	0
2020-06-28 07:04:00	0	0.199	33	0	0	0.257	37	0.517	87	0
2020-06-28 07:04:00	0	0.199	33	0	0	0.257	37	0.519	87	0
2020-06-28 07:04:00	0	0.199	34	0	0	0.257	37	0.519	87	0
2020-06-28 07:04:00	0	0.199	33	0	0	0.263	52	0.519	85	0
2020-06-28 07:04:00	0	0.199	34	0	0	0.263	54	0.519	86	0
2020-06-28 07:04:00	0	0.199	33	0	0	0.263	53	0.458	86	0
2020-06-28 07:04:00	0	0.199	33	0	0	0.316	53	0.458	71	0
2020-06-28 07:04:00	0	0.198	33	0	0	0.316	53	0.458	71	0
2020-06-28 07:04:00	0	0.198	33	0	0	0.316	54	0.456	71	0
2020-06-28 07:04:00	0	0.199	34	0	0	0.316	53	0.456	71	0
2020-06-28 07:04:00	0	0.199	34	0	0	0.316	53	0.457	71	0
2020-06-28 07:04:00	0	0.199	33	0	0	0.315	53	0.457	71	0
2020-06-28 07:04:00	0	0.199	33	0	0	0.315	53	0.459	71	0
2020-06-28 07:04:00	0	0.198	33	0	0	0.314	53	0.459	71	0
2020-06-28 07:04:00	0	0.198	33	0	0	0.314	53	0.459	72	0
2020-06-28 07:04:00	0	0.2	34	0	0	0.314	53	0.46	71	0
2020-06-28 07:05:00	0	0.2	33	0	0	0.316	55	0.46	72	0
2020-06-28 07:05:00	0	0.199	34	0	0	0.316	52	0.459	72	0
2020-06-28 07:05:00	0	0.199	34	0	0	0.316	54	0.459	71	0
2020-06-28 07:05:00	0	0.198	34	0	0	0.316	54	0.459	71	0
2020-06-28 07:05:00	0	0.198	33	0	0	0.316	38	0.459	71	0
2020-06-28 07:05:00	0	0.199	33	0	0	0.316	37	0.459	71	0
2020-06-28 07:05:00	0	0.199	34	0	0	0.257	37	0.459	71	0
2020-06-28 07:05:00	0	0.198	33	0	0	0.257	37	0.459	71	0
2020-06-28 07:05:00	0	0.198	33	0	0	0.257	37	0.458	71	0
2020-06-28 07:05:00	0	0.2	33	0	0	0.257	37	0.458	71	0
2020-06-28 07:05:00	0	0.2	33	0	0	0.257	37	0.458	71	0
2020-06-28 07:05:00	0	0.199	33	0	0	0.255	37	0.458	71	0
2020-06-28 07:05:00	0	0.199	33	0	0	0.255	37	0.458	71	0
2020-06-28 07:05:00	0	0.199	33	0	0	0.255	37	0.458	71	0
2020-06-28 07:05:00	0	0.199	33	0	0	0.255	37	0.458	71	0
2020-06-28 07:05:00	0	0.199	34	0	0	0.255	37	0.459	72	0
2020-06-28 07:05:00	0	0.199	33	0	0	0.255	37	0.459	70	0
2020-06-28 07:05:00	0	0.197	33	0	0	0.257	37	0.455	71	0
2020-06-28 07:05:00	0	0.197	34	0	0	0.257	37	0.455	72	0
2020-06-28 07:05:00	0	0.198	34	0	0	0.257	37	0.455	71	0
2020-06-28 07:05:00	0	0.198	33	0	0	0.257	37	0.457	71	0
2020-06-28 07:05:00	0	0.199	34	0	0	0.257	37	0.457	71	0
2020-06-28 07:05:00	0	0.199	33	0	0	0.257	37	0.458	70	0
2020-06-28 07:05:00	0	0.199	33	0	0	0.256	37	0.458	71	0
2020-06-28 07:05:00	0	0.199	33	0	0	0.256	37	0.457	71	0
2020-06-28 07:05:00	0	0.199	34	0	0	0.256	37	0.457	71	0
2020-06-28 07:05:00	0	0.199	33	0	0	0.256	37	0.457	71	0
2020-06-28 07:05:00	0	0.201	33	0	0	0.256	37	0.458	71	0
2020-06-28 07:05:00	0	0.201	34	0	0	0.256	37	0.458	71	0
2020-06-28 07:05:00	0	0.199	33	0	0	0.255	37	0.459	71	0
2020-06-28 07:05:00	0	0.199	33	0	0	0.255	37	0.459	71	0
2020-06-28 07:05:00	0	0.199	33	0	0	0.255	37	0.459	71	0
2020-06-28 07:05:00	0	0.198	33	0	0	0.257	37	0.459	74	0
2020-06-28 07:05:00	0	0.198	33	0	0	0.257	38	0.519	88	0
2020-06-28 07:05:00	0	0.199	34	0	0	0.257	37	0.519	87	0
2020-06-28 07:05:00	0	0.199	33	0	0	0.257	37	0.519	87	0
2020-06-28 07:05:00	0	0.2	33	0	0	0.257	37	0.519	87	0
2020-06-28 07:05:00	0	0.2	34	0	0	0.259	37	0.519	88	0
2020-06-28 07:05:00	0	0.199	33	0	0	0.259	38	0.519	87	0
2020-06-28 07:05:00	0	0.199	33	0	0	0.259	36	0.519	87	0
2020-06-28 07:05:00	0	0.199	34	0	0	0.254	36	0.517	87	0
2020-06-28 07:05:00	0	0.199	33	0	0	0.254	36	0.517	87	0
2020-06-28 07:05:00	0	0.198	33	0	0	0.254	36	0.517	87	0
2020-06-28 07:05:00	0	0.198	33	0	0	0.255	36	0.516	87	0
2020-06-28 07:05:00	0	0.2	33	0	0	0.255	36	0.516	87	0
2020-06-28 07:05:00	0	0.2	33	0	0	0.255	36	0.52	88	0
2020-06-28 07:05:00	0	0.199	34	0	0	0.255	37	0.52	85	0
2020-06-28 07:05:00	0	0.199	34	0	0	0.255	54	0.52	85	0
2020-06-28 07:05:00	0	0.197	34	0	0	0.316	53	0.52	87	0
2020-06-28 07:05:00	0	0.197	33	0	0	0.316	53	0.457	71	0
2020-06-28 07:05:00	0	0.201	34	0	0	0.316	53	0.457	71	0
2020-06-28 07:05:00	0	0.201	33	0	0	0.316	53	0.457	71	0
2020-06-28 07:05:00	0	0.199	33	0	0	0.316	53	0.458	71	0
2020-06-28 07:05:00	0	0.199	34	0	0	0.316	53	0.458	71	0
2020-06-28 07:05:00	0	0.199	33	0	0	0.315	53	0.459	71	0
2020-06-28 07:05:00	0	0.199	33	0	0	0.315	53	0.459	71	0
2020-06-28 07:05:00	0	0.198	33	0	0	0.316	53	0.459	71	0
2020-06-28 07:05:00	0	0.198	33	0	0	0.316	53	0.457	71	0
2020-06-28 07:05:00	0	0.2	33	0	0	0.316	53	0.457	71	0
2020-06-28 07:05:00	0	0.2	33	0	0	0.316	54	0.456	71	0
2020-06-28 07:06:00	0	0.199	34	0	0	0.316	51	0.456	71	0
2020-06-28 07:06:00	0	0.199	33	0	0	0.316	54	0.459	72	0
2020-06-28 07:06:00	0	0.2	33	0	0	0.317	53	0.459	71	0
2020-06-28 07:06:00	0	0.2	34	0	0	0.317	37	0.459	72	0
2020-06-28 07:06:00	0	0.198	33	0	0	0.257	37	0.458	71	0
2020-06-28 07:06:00	0	0.198	33	0	0	0.257	37	0.458	71	0
2020-06-28 07:06:00	0	0.201	33	0	0	0.257	37	0.459	72	0
2020-06-28 07:06:00	0	0.201	34	0	0	0.257	37	0.459	71	0
2020-06-28 07:06:00	0	0.197	33	0	0	0.257	37	0.459	71	0
2020-06-28 07:06:00	0	0.197	33	0	0	0.257	38	0.459	71	0
2020-06-28 07:06:00	0	0.2	33	0	0	0.257	37	0.458	71	0
2020-06-28 07:06:00	0	0.2	34	0	0	0.257	37	0.458	71	0
2020-06-28 07:06:00	0	0.199	33	0	0	0.257	37	0.458	71	0
2020-06-28 07:06:00	0	0.199	34	0	0	0.256	37	0.457	71	0
2020-06-28 07:06:00	0	0.198	33	0	0	0.256	37	0.457	71	0
2020-06-28 07:06:00	0	0.198	33	0	0	0.256	37	0.458	71	0
2020-06-28 07:06:00	0	0.198	33	0	0	0.257	37	0.458	71	0
2020-06-28 07:06:00	0	0.198	33	0	0	0.257	37	0.458	71	0
2020-06-28 07:06:00	0	0.198	33	0	0	0.257	37	0.458	72	0
2020-06-28 07:06:00	0	0.198	33	0	0	0.256	37	0.458	71	0
2020-06-28 07:06:00	0	0.198	33	0	0	0.256	37	0.459	71	0
2020-06-28 07:06:00	0	0.2	33	0	0	0.256	37	0.459	72	0
2020-06-28 07:06:00	0	0.2	33	0	0	0.257	37	0.46	73	0
2020-06-28 07:06:00	0	0.199	33	0	0	0.257	37	0.46	71	0
2020-06-28 07:06:00	0	0.2	33	0	0	0.257	37	0.456	70	0
2020-06-28 07:06:00	0	0.2	33	0	0	0.257	37	0.456	71	0
2020-06-28 07:06:00	0	0.201	34	0	0	0.257	37	0.456	70	0
2020-06-28 07:06:00	0	0.201	34	0	0	0.257	37	0.456	71	0
2020-06-28 07:06:00	0	0.198	33	0	0	0.255	37	0.456	71	0
2020-06-28 07:06:00	0	0.198	33	0	0	0.255	37	0.457	71	0
2020-06-28 07:06:00	0	0.198	34	0	0	0.257	37	0.457	71	0
2020-06-28 07:06:00	0	0.2	33	0	0	0.257	37	0.478	81	0
2020-06-28 07:06:00	0	0.2	34	0	0	0.257	37	0.478	81	0
2020-06-28 07:06:00	0	0.198	33	0	0	0.256	37	0.478	88	0
2020-06-28 07:06:00	0	0.198	33	0	0	0.256	37	0.518	87	0
2020-06-28 07:06:00	0	0.2	33	0	0	0.256	37	0.518	87	0
2020-06-28 07:06:00	0	0.2	33	0	0	0.256	37	0.519	87	0
2020-06-28 07:06:00	0	0.198	33	0	0	0.256	37	0.519	87	0
2020-06-28 07:06:00	0	0.198	34	0	0	0.256	37	0.517	87	0
2020-06-28 07:06:00	0	0.197	33	0	0	0.257	37	0.517	87	0
2020-06-28 07:06:00	0	0.197	34	0	0	0.257	37	0.518	87	0
2020-06-28 07:06:00	0	0.198	33	0	0	0.257	37	0.518	87	0
2020-06-28 07:06:00	0	0.198	33	0	0	0.257	37	0.518	87	0
2020-06-28 07:06:00	0	0.199	33	0	0	0.257	37	0.519	87	0
2020-06-28 07:06:00	0	0.199	33	0	0	0.257	37	0.519	87	0
2020-06-28 07:06:00	0	0.2	33	0	0	0.255	37	0.525	88	0
2020-06-28 07:06:00	0	0.2	34	0	0	0.255	57	0.525	85	0
2020-06-28 07:06:00	0	0.199	34	0	0	0.317	53	0.518	88	0
2020-06-28 07:06:00	0	0.199	33	0	0	0.317	53	0.518	88	0
2020-06-28 07:06:00	0	0.197	33	0	0	0.317	53	0.518	71	0
2020-06-28 07:06:00	0	0.197	33	0	0	0.317	53	0.458	71	0
2020-06-28 07:06:00	0	0.2	33	0	0	0.317	54	0.458	71	0
2020-06-28 07:06:00	0	0.2	33	0	0	0.317	53	0.458	71	0
2020-06-28 07:06:00	0	0.2	33	0	0	0.314	53	0.458	72	0
2020-06-28 07:06:00	0	0.2	34	0	0	0.314	53	0.462	72	0
2020-06-28 07:06:00	0	0.199	33	0	0	0.314	53	0.462	71	0
2020-06-28 07:06:00	0	0.199	34	0	0	0.314	53	0.458	71	0
2020-06-28 07:06:00	0	0.198	33	0	0	0.314	54	0.458	71	0
2020-06-28 07:06:00	0	0.198	33	0	0	0.317	53	0.458	71	0
2020-06-28 07:07:00	0	0.2	33	0	0	0.317	53	0.458	71	0
2020-06-28 07:07:00	0	0.2	33	0	0	0.308	53	0.458	71	0
2020-06-28 07:07:00	0	0.199	33	0	0	0.308	52	0.459	71	0
2020-06-28 07:07:00	0	0.199	34	0	0	0.308	38	0.459	72	0
2020-06-28 07:07:00	0	0.198	33	0	0	0.257	36	0.458	71	0
2020-06-28 07:07:00	0	0.198	33	0	0	0.257	37	0.458	71	0
2020-06-28 07:07:00	0	0.198	33	0	0	0.257	37	0.458	71	0
2020-06-28 07:07:00	0	0.198	33	0	0	0.254	36	0.459	71	0
2020-06-28 07:07:00	0	0.199	33	0	0	0.254	37	0.458	71	0
2020-06-28 07:07:00	0	0.199	33	0	0	0.254	37	0.458	71	0
2020-06-28 07:07:00	0	0.198	33	0	0	0.255	36	0.458	71	0
2020-06-28 07:07:00	0	0.198	33	0	0	0.255	36	0.458	71	0
2020-06-28 07:07:00	0	0.2	34	0	0	0.255	36	0.458	71	0
2020-06-28 07:07:00	0	0.2	33	0	0	0.255	36	0.457	71	0
2020-06-28 07:07:00	0	0.199	33	0	0	0.255	37	0.457	71	0
2020-06-28 07:07:00	0	0.199	33	0	0	0.255	37	0.459	71	0
2020-06-28 07:07:00	0	0.199	33	0	0	0.256	37	0.459	71	0
2020-06-28 07:07:00	0	0.199	33	0	0	0.256	37	0.46	72	0
2020-06-28 07:07:00	0	0.199	33	0	0	0.256	37	0.46	71	0
2020-06-28 07:07:00	0	0.198	33	0	0	0.257	37	0.46	71	0
2020-06-28 07:07:00	0	0.198	33	0	0	0.257	37	0.457	71	0
2020-06-28 07:07:00	0	0.199	34	0	0	0.257	37	0.457	72	0
2020-06-28 07:07:00	0	0.199	34	0	0	0.257	37	0.459	72	0
2020-06-28 07:07:00	0	0.198	33	0	0	0.257	37	0.459	71	0
2020-06-28 07:07:00	0	0.198	33	0	0	0.256	37	0.458	71	0
2020-06-28 07:07:00	0	0.202	34	0	0	0.256	37	0.458	71	0
2020-06-28 07:07:00	0	0.202	33	0	0	0.256	37	0.458	71	0
2020-06-28 07:07:00	0	0.201	38	0	0	0.255	37	0.459	71	0
2020-06-28 07:07:00	0	0.201	34	0	0	0.255	37	0.459	71	0
2020-06-28 07:07:00	0	0.2	33	0	0	0.255	37	0.458	70	0
2020-06-28 07:07:00	0	0.2	33	0	0	0.257	37	0.458	71	0
2020-06-28 07:07:00	0	0.198	33	0	0	0.257	37	0.539	72	0
2020-06-28 07:07:00	0	0.198	33	0	0	0.257	38	0.539	91	0
2020-06-28 07:07:00	0	0.199	34	0	0	0.26	38	0.539	87	0
2020-06-28 07:07:00	0	0.199	33	0	0	0.26	37	0.519	87	0
2020-06-28 07:07:00	0	0.199	34	0	0	0.26	37	0.519	87	0
2020-06-28 07:07:00	0	0.199	33	0	0	0.257	37	0.521	87	0
2020-06-28 07:07:00	0	0.198	33	0	0	0.257	37	0.521	87	0
2020-06-28 07:07:00	0	0.198	33	0	0	0.257	37	0.517	87	0
2020-06-28 07:07:00	0	0.2	33	0	0	0.257	37	0.517	87	0
2020-06-28 07:07:00	0	0.2	33	0	0	0.257	37	0.517	87	0
2020-06-28 07:07:00	0	0.199	33	0	0	0.257	37	0.517	87	0
2020-06-28 07:07:00	0	0.199	33	0	0	0.255	37	0.517	87	0
2020-06-28 07:07:00	0	0.199	33	0	0	0.255	37	0.521	88	0
2020-06-28 07:07:00	0	0.199	34	0	0	0.257	37	0.521	88	0
2020-06-28 07:07:00	0	0.198	33	0	0	0.257	37	0.502	85	0
2020-06-28 07:07:00	0	0.198	33	0	0	0.257	54	0.502	85	0
2020-06-28 07:07:00	0	0.2	35	0	0	0.32	54	0.51	87	0
2020-06-28 07:07:00	0	0.2	33	0	0	0.32	53	0.51	71	0
2020-06-28 07:07:00	0	0.2	34	0	0	0.32	53	0.51	71	0
2020-06-28 07:07:00	0	0.2	34	0	0	0.315	54	0.458	70	0
2020-06-28 07:07:00	0	0.197	33	0	0	0.315	57	0.458	71	0
2020-06-28 07:07:00	0	0.197	33	0	0	0.318	54	0.455	71	0
2020-06-28 07:07:00	0	0.2	34	0	0	0.318	53	0.455	71	0
2020-06-28 07:07:00	0	0.2	33	0	0	0.318	54	0.456	70	0
2020-06-28 07:07:00	0	0.198	34	0	0	0.318	53	0.456	71	0
2020-06-28 07:07:00	0	0.198	33	0	0	0.318	54	0.456	71	0
2020-06-28 07:07:00	0	0.2	33	0	0	0.316	53	0.456	70	0
2020-06-28 07:07:00	0	0.2	33	0	0	0.316	53	0.456	71	0
2020-06-28 07:08:00	0	0.199	33	0	0	0.316	55	0.456	71	0
2020-06-28 07:08:00	0	0.199	33	0	0	0.311	52	0.456	71	0
2020-06-28 07:08:00	0	0.2	33	0	0	0.311	54	0.459	72	0
2020-06-28 07:08:00	0	0.2	33	0	0	0.311	51	0.459	72	0
2020-06-28 07:08:00	0	0.199	33	0	0	0.276	38	0.459	73	0
2020-06-28 07:08:00	0	0.199	33	0	0	0.276	37	0.459	71	0
2020-06-28 07:08:00	0	0.199	33	0	0	0.276	37	0.459	71	0
2020-06-28 07:08:00	0	0.199	33	0	0	0.257	37	0.458	71	0
2020-06-28 07:08:00	0	0.198	33	0	0	0.257	37	0.458	71	0
2020-06-28 07:08:00	0	0.198	33	0	0	0.257	37	0.458	71	0
2020-06-28 07:08:00	0	0.199	33	0	0	0.257	37	0.458	71	0
2020-06-28 07:08:00	0	0.199	33	0	0	0.257	37	0.458	71	0
2020-06-28 07:08:00	0	0.2	34	0	0	0.257	37	0.458	71	0
2020-06-28 07:08:00	0	0.2	33	0	0	0.255	37	0.458	71	0
2020-06-28 07:08:00	0	0.199	33	0	0	0.255	37	0.459	71	0
2020-06-28 07:08:00	0	0.199	33	0	0	0.256	37	0.459	71	0
2020-06-28 07:08:00	0	0.2	33	0	0	0.256	37	0.459	72	0
2020-06-28 07:08:00	0	0.2	33	0	0	0.256	37	0.459	72	0
2020-06-28 07:08:00	0	0.199	34	0	0	0.256	37	0.459	72	0
2020-06-28 07:08:00	0	0.199	33	0	0	0.255	37	0.458	71	0
2020-06-28 07:08:00	0	0.198	33	0	0	0.255	37	0.458	71	0
2020-06-28 07:08:00	0	0.198	33	0	0	0.256	37	0.458	71	0
2020-06-28 07:08:00	0	0.198	33	0	0	0.256	37	0.464	72	0
2020-06-28 07:08:00	0	0.199	33	0	0	0.256	37	0.464	71	0
2020-06-28 07:08:00	0	0.2	33	0	0	0.256	37	0.464	71	0
2020-06-28 07:08:00	0	0.2	34	0	0	0.256	36	0.458	70	0
2020-06-28 07:08:00	0	0.2	34	0	0	0.256	38	0.458	71	0
2020-06-28 07:08:00	0	0.199	33	0	0	0.26	36	0.458	71	0
2020-06-28 07:08:00	0	0.199	33	0	0	0.26	36	0.458	71	0
2020-06-28 07:08:00	0	0.2	34	0	0	0.26	36	0.458	71	0
2020-06-28 07:08:00	0	0.2	33	0	0	0.254	36	0.458	83	0
2020-06-28 07:08:00	0	0.199	34	0	0	0.254	36	0.458	83	0
2020-06-28 07:08:00	0	0.199	34	0	0	0.256	36	0.519	88	0
2020-06-28 07:08:00	0	0.199	33	0	0	0.256	37	0.519	88	0
2020-06-28 07:08:00	0	0.199	33	0	0	0.256	37	0.519	87	0
2020-06-28 07:08:00	0	0.199	34	0	0	0.256	37	0.519	89	0
2020-06-28 07:08:00	0	0.199	33	0	0	0.256	37	0.527	89	0
2020-06-28 07:08:00	0	0.199	33	0	0	0.256	37	0.527	89	0
2020-06-28 07:08:00	0	0.199	34	0	0	0.257	37	0.52	87	0
2020-06-28 07:08:00	0	0.199	33	0	0	0.257	37	0.52	88	0
2020-06-28 07:08:00	0	0.199	33	0	0	0.257	37	0.52	87	0
2020-06-28 07:08:00	0	0.201	34	0	0	0.258	38	0.519	87	0
2020-06-28 07:08:00	0	0.201	33	0	0	0.258	38	0.519	87	0
2020-06-28 07:08:00	0	0.2	34	0	0	0.258	37	0.52	87	0
2020-06-28 07:08:00	0	0.2	33	0	0	0.257	37	0.52	88	0
2020-06-28 07:08:00	0	0.2	33	0	0	0.257	37	0.521	86	0
2020-06-28 07:08:00	0	0.2	34	0	0	0.257	53	0.521	87	0
2020-06-28 07:08:00	0	0.199	33	0	0	0.297	54	0.461	87	0
2020-06-28 07:08:00	0	0.199	33	0	0	0.297	53	0.461	72	0
2020-06-28 07:08:00	0	0.198	33	0	0	0.315	53	0.461	71	0
2020-06-28 07:08:00	0	0.198	34	0	0	0.315	54	0.458	71	0
2020-06-28 07:08:00	0	0.2	34	0	0	0.315	53	0.458	71	0
2020-06-28 07:08:00	0	0.2	34	0	0	0.315	53	0.458	71	0
2020-06-28 07:08:00	0	0.198	34	0	0	0.315	53	0.458	71	0
2020-06-28 07:08:00	0	0.198	33	0	0	0.315	53	0.457	71	0
2020-06-28 07:08:00	0	0.198	33	0	0	0.315	53	0.457	71	0
2020-06-28 07:08:00	0	0.198	33	0	0	0.315	53	0.457	71	0
2020-06-28 07:08:00	0	0.198	33	0	0	0.314	53	0.457	71	0
2020-06-28 07:09:00	0	0.198	33	0	0	0.314	53	0.457	71	0
2020-06-28 07:09:00	0	0.2	34	0	0	0.314	55	0.457	71	0
2020-06-28 07:09:00	0	0.2	33	0	0	0.319	47	0.46	71	0
2020-06-28 07:09:00	0	0.2	34	0	0	0.319	53	0.458	71	0
2020-06-28 07:09:00	0	0.2	33	0	0	0.302	43	0.458	70	0
2020-06-28 07:09:00	0	0.199	33	0	0	0.302	37	0.458	71	0
2020-06-28 07:09:00	0	0.199	33	0	0	0.302	37	0.457	71	0
2020-06-28 07:09:00	0	0.198	34	0	0	0.257	37	0.457	70	0
2020-06-28 07:09:00	0	0.198	33	0	0	0.257	37	0.458	71	0
2020-06-28 07:09:00	0	0.199	33	0	0	0.257	37	0.458	71	0
2020-06-28 07:09:00	0	0.199	34	0	0	0.257	37	0.455	71	0
2020-06-28 07:09:00	0	0.199	33	0	0	0.257	37	0.455	73	0
2020-06-28 07:09:00	0	0.199	33	0	0	0.257	37	0.455	72	0
2020-06-28 07:09:00	0	0.199	33	0	0	0.256	36	0.459	70	0
2020-06-28 07:09:00	0	0.199	33	0	0	0.256	37	0.459	70	0
2020-06-28 07:09:00	0	0.2	33	0	0	0.256	36	0.456	70	0
2020-06-28 07:09:00	0	0.2	33	0	0	0.256	37	0.456	71	0
2020-06-28 07:09:00	0	0.199	33	0	0	0.256	37	0.458	71	0
2020-06-28 07:09:00	0	0.199	33	0	0	0.256	37	0.458	72	0
2020-06-28 07:09:00	0	0.198	33	0	0	0.257	37	0.458	71	0
2020-06-28 07:09:00	0	0.198	33	0	0	0.257	37	0.457	71	0
2020-06-28 07:09:00	0	0.2	34	0	0	0.257	37	0.457	71	0
2020-06-28 07:09:00	0	0.2	33	0	0	0.257	37	0.459	71	0
2020-06-28 07:09:00	0	0.199	33	0	0	0.257	37	0.459	72	0
2020-06-28 07:09:00	0	0.199	34	0	0	0.257	37	0.458	72	0
2020-06-28 07:09:00	0	0.199	33	0	0	0.257	37	0.458	71	0
2020-06-28 07:09:00	0	0.199	33	0	0	0.257	37	0.458	72	0
2020-06-28 07:09:00	0	0.199	34	0	0	0.255	37	0.459	72	0
2020-06-28 07:09:00	0	0.199	33	0	0	0.255	37	0.459	71	0
2020-06-28 07:09:00	0	0.199	33	0	0	0.255	37	0.458	71	0
2020-06-28 07:09:00	0	0.198	33	0	0	0.257	37	0.458	71	0
2020-06-28 07:09:00	0	0.198	34	0	0	0.257	37	0.457	71	0
2020-06-28 07:09:00	0	0.199	34	0	0	0.257	37	0.457	71	0
2020-06-28 07:09:00	0	0.199	34	0	0	0.257	37	0.457	87	0
2020-06-28 07:09:00	0	0.198	33	0	0	0.257	37	0.517	87	0
2020-06-28 07:09:00	0	0.198	33	0	0	0.257	37	0.517	87	0
2020-06-28 07:09:00	0	0.199	33	0	0	0.256	37	0.518	87	0
2020-06-28 07:09:00	0	0.199	33	0	0	0.256	37	0.518	88	0
2020-06-28 07:09:00	0	0.2	33	0	0	0.256	37	0.518	87	0
2020-06-28 07:09:00	0	0.2	33	0	0	0.256	37	0.518	87	0
2020-06-28 07:09:00	0	0.199	33	0	0	0.256	37	0.519	87	0
2020-06-28 07:09:00	0	0.199	33	0	0	0.256	37	0.519	87	0
2020-06-28 07:09:00	0	0.198	33	0	0	0.257	37	0.519	87	0
2020-06-28 07:09:00	0	0.198	33	0	0	0.257	37	0.517	87	0
2020-06-28 07:09:00	0	0.198	33	0	0	0.257	37	0.517	87	0
2020-06-28 07:09:00	0	0.198	33	0	0	0.257	37	0.52	88	0
2020-06-28 07:09:00	0	0.198	33	0	0	0.257	38	0.52	84	0
2020-06-28 07:09:00	0	0.198	33	0	0	0.268	41	0.518	84	0
2020-06-28 07:09:00	0	0.198	33	0	0	0.268	53	0.518	87	0
2020-06-28 07:09:00	0	0.198	33	0	0	0.268	53	0.456	71	0
2020-06-28 07:09:00	0	0.199	34	0	0	0.315	53	0.456	71	0
2020-06-28 07:09:00	0	0.199	33	0	0	0.315	52	0.456	71	0
2020-06-28 07:09:00	0	0.2	33	0	0	0.313	53	0.457	71	0
2020-06-28 07:09:00	0	0.2	34	0	0	0.313	53	0.457	71	0
2020-06-28 07:09:00	0	0.199	34	0	0	0.313	53	0.458	71	0
2020-06-28 07:09:00	0	0.199	34	0	0	0.313	53	0.458	71	0
2020-06-28 07:09:00	0	0.2	33	0	0	0.313	53	0.458	71	0
2020-06-28 07:09:00	0	0.2	33	0	0	0.313	53	0.458	70	0
2020-06-28 07:09:00	0	0.199	33	0	0	0.317	53	0.458	71	0
2020-06-28 07:09:00	0	0.199	33	0	0	0.317	53	0.456	71	0
2020-06-28 07:10:00	0	0.2	34	0	0	0.317	53	0.456	73	0
2020-06-28 07:10:00	0	0.2	33	0	0	0.317	49	0.463	71	0
2020-06-28 07:10:00	0	0.198	33	0	0	0.317	53	0.463	71	0
2020-06-28 07:10:00	0	0.198	33	0	0	0.316	54	0.459	72	0
2020-06-28 07:10:00	0	0.2	33	0	0	0.316	42	0.459	72	0
2020-06-28 07:10:00	0	0.2	34	0	0	0.316	37	0.459	71	0
2020-06-28 07:10:00	0	0.199	33	0	0	0.255	36	0.459	71	0
2020-06-28 07:10:00	0	0.199	33	0	0	0.255	36	0.459	71	0
2020-06-28 07:10:00	0	0.2	33	0	0	0.255	37	0.459	71	0
2020-06-28 07:10:00	0	0.2	33	0	0	0.255	36	0.459	71	0
2020-06-28 07:10:00	0	0.2	33	0	0	0.255	37	0.457	71	0
2020-06-28 07:10:00	0	0.198	33	0	0	0.258	38	0.457	71	0
2020-06-28 07:10:00	0	0.198	33	0	0	0.258	36	0.457	71	0
2020-06-28 07:10:00	0	0.2	33	0	0	0.258	36	0.457	71	0
2020-06-28 07:10:00	0	0.2	34	0	0	0.254	36	0.457	71	0
2020-06-28 07:10:00	0	0.199	34	0	0	0.254	37	0.458	71	0
2020-06-28 07:10:00	0	0.199	34	0	0	0.254	37	0.458	71	0
2020-06-28 07:10:00	0	0.199	34	0	0	0.257	37	0.458	71	0
2020-06-28 07:10:00	0	0.199	33	0	0	0.257	37	0.459	71	0
2020-06-28 07:10:00	0	0.199	33	0	0	0.257	37	0.459	71	0
2020-06-28 07:10:00	0	0.199	33	0	0	0.257	37	0.458	71	0
2020-06-28 07:10:00	0	0.199	33	0	0	0.257	37	0.458	71	0
2020-06-28 07:10:00	0	0.199	33	0	0	0.257	37	0.457	71	0
2020-06-28 07:10:00	0	0.199	33	0	0	0.255	37	0.457	71	0
2020-06-28 07:10:00	0	0.199	33	0	0	0.255	37	0.457	71	0
2020-06-28 07:10:00	0	0.199	33	0	0	0.255	37	0.458	71	0
2020-06-28 07:10:00	0	0.199	33	0	0	0.256	37	0.458	71	0
2020-06-28 07:10:00	0	0.201	33	0	0	0.256	37	0.459	71	0
2020-06-28 07:10:00	0	0.201	33	0	0	0.256	37	0.459	71	0
2020-06-28 07:10:00	0	0.199	33	0	0	0.257	37	0.46	71	0
2020-06-28 07:10:00	0	0.199	34	0	0	0.257	37	0.46	72	0
2020-06-28 07:10:00	0	0.197	33	0	0	0.257	37	0.46	81	0
2020-06-28 07:10:00	0	0.197	33	0	0	0.256	37	0.503	88	0
2020-06-28 07:10:00	0	0.199	33	0	0	0.256	37	0.503	88	0
2020-06-28 07:10:00	0	0.199	33	0	0	0.256	37	0.518	87	0
2020-06-28 07:10:00	0	0.199	33	0	0	0.255	37	0.518	87	0
2020-06-28 07:10:00	0	0.199	33	0	0	0.255	37	0.516	87	0
2020-06-28 07:10:00	0	0.198	33	0	0	0.256	37	0.516	86	0
2020-06-28 07:10:00	0	0.198	33	0	0	0.256	37	0.517	86	0
2020-06-28 07:10:00	0	0.199	33	0	0	0.256	37	0.517	87	0
2020-06-28 07:10:00	0	0.199	33	0	0	0.257	37	0.517	87	0
2020-06-28 07:10:00	0	0.198	33	0	0	0.257	37	0.519	87	0
2020-06-28 07:10:00	0	0.198	33	0	0	0.257	37	0.519	87	0
2020-06-28 07:10:00	0	0.198	33	0	0	0.258	37	0.519	87	0
2020-06-28 07:10:00	0	0.198	33	0	0	0.258	37	0.519	87	0
2020-06-28 07:10:00	0	0.198	33	0	0	0.258	37	0.52	88	0
2020-06-28 07:10:00	0	0.198	33	0	0	0.256	37	0.52	85	0
2020-06-28 07:10:00	0	0.2	34	0	0	0.256	55	0.515	88	0
2020-06-28 07:10:00	0	0.2	34	0	0	0.256	53	0.515	88	0
2020-06-28 07:10:00	0	0.2	34	0	0	0.315	53	0.515	71	0
2020-06-28 07:10:00	0	0.2	33	0	0	0.315	53	0.458	71	0
2020-06-28 07:10:00	0	0.198	33	0	0	0.316	53	0.458	71	0
2020-06-28 07:10:00	0	0.198	33	0	0	0.316	53	0.458	70	0
2020-06-28 07:10:00	0	0.2	34	0	0	0.316	53	0.458	71	0
2020-06-28 07:10:00	0	0.2	33	0	0	0.315	53	0.457	71	0
2020-06-28 07:10:00	0	0.2	34	0	0	0.315	53	0.457	70	0
2020-06-28 07:10:00	0	0.2	34	0	0	0.314	53	0.455	71	0
2020-06-28 07:10:00	0	0.198	33	0	0	0.314	53	0.455	70	0
2020-06-28 07:11:00	0	0.198	33	0	0	0.314	53	0.456	71	0
2020-06-28 07:11:00	0	0.198	33	0	0	0.316	54	0.456	71	0
2020-06-28 07:11:00	0	0.198	33	0	0	0.316	53	0.459	71	0
2020-06-28 07:11:00	0	0.2	33	0	0	0.317	54	0.459	71	0
2020-06-28 07:11:00	0	0.2	33	0	0	0.317	54	0.459	71	0
2020-06-28 07:11:00	0	0.198	33	0	0	0.317	40	0.459	71	0
2020-06-28 07:11:00	0	0.198	33	0	0	0.26	38	0.459	71	0
2020-06-28 07:11:00	0	0.199	33	0	0	0.26	36	0.457	71	0
2020-06-28 07:11:00	0	0.199	33	0	0	0.26	36	0.457	71	0
2020-06-28 07:11:00	0	0.197	33	0	0	0.255	37	0.457	71	0
2020-06-28 07:11:00	0	0.197	33	0	0	0.255	37	0.457	71	0
2020-06-28 07:11:00	0	0.199	33	0	0	0.255	37	0.457	71	0
2020-06-28 07:11:00	0	0.199	33	0	0	0.257	37	0.458	71	0
2020-06-28 07:11:00	0	0.199	33	0	0	0.257	37	0.458	71	0
2020-06-28 07:11:00	0	0.199	33	0	0	0.257	36	0.458	71	0
2020-06-28 07:11:00	0	0.199	33	0	0	0.256	37	0.458	71	0
2020-06-28 07:11:00	0	0.198	33	0	0	0.256	37	0.458	71	0
2020-06-28 07:11:00	0	0.198	33	0	0	0.256	37	0.457	71	0
2020-06-28 07:11:00	0	0.199	33	0	0	0.256	37	0.457	71	0
2020-06-28 07:11:00	0	0.199	33	0	0	0.256	37	0.457	71	0
2020-06-28 07:11:00	0	0.199	33	0	0	0.256	37	0.457	71	0
2020-06-28 07:11:00	0	0.199	33	0	0	0.257	37	0.458	71	0
2020-06-28 07:11:00	0	0.198	33	0	0	0.257	37	0.458	71	0
2020-06-28 07:11:00	0	0.198	33	0	0	0.257	37	0.462	71	0
2020-06-28 07:11:00	0	0.198	33	0	0	0.257	37	0.462	71	0
2020-06-28 07:11:00	0	0.198	34	0	0	0.257	37	0.462	71	0
2020-06-28 07:11:00	0	0.199	33	0	0	0.257	37	0.459	71	0
2020-06-28 07:11:00	0	0.199	34	0	0	0.256	37	0.459	71	0
2020-06-28 07:11:00	0	0.199	33	0	0	0.256	37	0.459	71	0
2020-06-28 07:11:00	0	0.199	33	0	0	0.256	37	0.459	71	0
2020-06-28 07:11:00	0	0.199	34	0	0	0.256	37	0.458	71	0
2020-06-28 07:11:00	0	0.199	33	0	0	0.256	37	0.458	71	0
2020-06-28 07:11:00	0	0.199	33	0	0	0.255	37	0.458	73	0
2020-06-28 07:11:00	0	0.199	33	0	0	0.255	37	0.522	87	0
2020-06-28 07:11:00	0	0.2	33	0	0	0.255	38	0.522	87	0
2020-06-28 07:11:00	0	0.2	33	0	0	0.259	37	0.517	87	0
2020-06-28 07:11:00	0	0.199	33	0	0	0.259	37	0.517	87	0
2020-06-28 07:11:00	0	0.199	33	0	0	0.259	37	0.519	87	0
2020-06-28 07:11:00	0	0.198	33	0	0	0.256	37	0.519	87	0
2020-06-28 07:11:00	0	0.198	33	0	0	0.256	37	0.519	87	0
2020-06-28 07:11:00	0	0.197	33	0	0	0.256	38	0.518	87	0
2020-06-28 07:11:00	0	0.197	33	0	0	0.262	39	0.518	87	0
2020-06-28 07:11:00	0	0.199	33	0	0	0.262	39	0.516	87	0
2020-06-28 07:11:00	0	0.199	33	0	0	0.262	39	0.516	87	0
2020-06-28 07:11:00	0	0.199	34	0	0	0.261	38	0.518	87	0
2020-06-28 07:11:00	0	0.199	33	0	0	0.261	37	0.518	88	0
2020-06-28 07:11:00	0	0.198	34	0	0	0.261	37	0.508	85	0
2020-06-28 07:11:00	0	0.198	33	0	0	0.256	37	0.508	85	0
2020-06-28 07:11:00	0	0.198	33	0	0	0.256	44	0.508	88	0
2020-06-28 07:11:00	0	0.2	33	0	0	0.32	53	0.463	72	0
2020-06-28 07:11:00	0	0.198	34	0	0	0.32	53	0.463	71	0
2020-06-28 07:11:00	0	0.198	33	0	0	0.32	55	0.455	70	0
2020-06-28 07:11:00	0	0.2	33	0	0	0.322	53	0.455	71	0
2020-06-28 07:11:00	0	0.2	33	0	0	0.322	53	0.458	71	0
2020-06-28 07:11:00	0	0.199	33	0	0	0.315	53	0.458	71	0
2020-06-28 07:11:00	0	0.199	33	0	0	0.315	53	0.458	71	0
2020-06-28 07:11:00	0	0.2	33	0	0	0.315	53	0.459	71	0
2020-06-28 07:11:00	0	0.2	34	0	0	0.315	53	0.459	71	0
2020-06-28 07:11:00	0	0.2	33	0	0	0.315	53	0.458	71	0
2020-06-28 07:11:00	0	0.2	33	0	0	0.315	54	0.458	71	0
2020-06-28 07:12:00	0	0.198	33	0	0	0.318	53	0.459	71	0
2020-06-28 07:12:00	0	0.198	33	0	0	0.318	54	0.459	71	0
2020-06-28 07:12:00	0	0.2	33	0	0	0.307	48	0.459	71	0
2020-06-28 07:12:00	0	0.2	33	0	0	0.307	53	0.459	72	0
2020-06-28 07:12:00	0	0.2	34	0	0	0.307	54	0.459	71	0
2020-06-28 07:12:00	0	0.199	33	0	0	0.263	37	0.459	71	0
2020-06-28 07:12:00	0	0.199	33	0	0	0.263	37	0.459	71	0
2020-06-28 07:12:00	0	0.2	34	0	0	0.263	37	0.459	71	0
2020-06-28 07:12:00	0	0.2	33	0	0	0.256	37	0.459	71	0
[truncated: 150,395 more rows]

## Sheet: Application ID and Class ID
Application ID	Application Name	Group ID	Group Name
0	Idle	0	No Class/Desktop Unused
1	Netbeans	1	Programming
2	Micosoft Office Word	2	English Writing
3	YouTube 240p	3	Mutimedia 1
4	YouTube 360p	3	Mutimedia 1
5	YouTube 1080p	3	Mutimedia 1
6	YouTube 1440p	3	Mutimedia 1
7	YouTube 4K	3	Mutimedia 1
8	Microsoft Office Excel	4	Accounting
9	Windows Paint 3D	5	Design 3D - 1
10	Copy Large Files From PC to USB	6	Mutimedia 2
11	Copy Large Files From USB to PC	6	Mutimedia 2
12	Game	6	Mutimedia 2
13	Fusion 360	7	Design 3D - 2
14	Microsoft Office PowerPoint	8	Presentation
15	Google Chrome (Browsing)	9	General
16	Virus File Opened	1	Programming
